# Supplementary material for: Design principles for α-tocopherol analogues
Source: Royal Society of Chemistry journal article supplement (doi:10.1039/b515712a), 2006-01-01
Supplement: b515712a.pdf [file b515712a.pdf]

## Supporting Information:

Design principles for  $\alpha$ -tocopherol analoguesDavid Shanks,<sup>\*a</sup> Håkan Frisell,<sup>b</sup> Henrik Ottosson,<sup>a</sup> and Lars Engman<sup>\*a</sup><sup>a</sup> Department of Chemistry, Organic Chemistry, Box 599, Uppsala University, SE-751 24 Uppsala, Sweden; E-mail: lars.engman@kemi.uu.se<sup>b</sup> Department of Organic Chemistry, Karlstad University, SE-651 88 Karlstad, Sweden.Contents

- i. Tables of calculated vs experimental IP and BDE values for reference compounds. S1  
 ii. Geometrical parameters and  $\Delta$ BDE values for compounds 4-7. S2  
 iii. Absolute energies, energy corrections and cartesian coordinates for compounds 4-6. S3-S12

## i. Table of calculated vs experimental IP values for reference compounds.

| compound                                    | calculated IP / eV | Experimental IP / eV |        |         |
|---------------------------------------------|--------------------|----------------------|--------|---------|
|                                             |                    | Median               | Lowest | Highest |
| 4-methoxyphenol                             | 7.51               | 7.75                 | 7.50   | 8.00    |
| 4-methoxytoluene                            | 7.63               | 7.90                 | 7.83   | 8.30    |
| dimethyl telluride                          | 7.82               | 7.89                 | 7.85   | 7.93    |
| thioanisole                                 | 7.77               | 7.94                 | 7.90   | 8.90    |
| hydroquinone                                | 7.77               | 7.94                 | 7.93   | 7.95    |
| 2-methoxythiophene                          | 7.76               | 8.14                 | 8.02   | 8.30    |
| anisole                                     | 7.95               | 8.20                 | 8.10   | 8.80    |
| 4-methylphenol                              | 7.93               | 8.34                 | 8.13   | 8.97    |
| benzo[b]thiophene                           | 7.98               | 8.17                 | 8.13   | 8.73    |
| 2-methylthiophene                           | 8.26               | 8.61                 | 8.14   | 8.63    |
| phenol                                      | 8.30               | 8.49                 | 8.21   | 9.10    |
| tellurophene                                | 8.33               | 8.36                 | 8.27   | 8.60    |
| benzenethiol                                | 8.18               | 8.30                 | 8.28   | 9.00    |
| Benzo[b]furan                               | 8.16               | 8.36                 | 8.29   | 8.85    |
| 2-methylfuran                               | 8.31               | 8.38                 | 8.31   | 8.57    |
| 2-methylselenophene                         | 8.09               | 8.39                 | 8.37   | 8.40    |
| tetrahydrothiophene                         | 8.31               | 8.38                 | 8.38   | 8.62    |
| 2-acetylselenophene                         | 8.71               | 9.01                 | 8.72   | 9.30    |
| selenophene                                 | 8.60               | 8.96                 | 8.78   | 9.01    |
| thiophene                                   | 8.77               | 8.86                 | 8.80   | 9.12    |
| furan                                       | 8.88               | 8.88                 | 8.83   | 9.00    |
| 2-acetylfuran                               | 9.02               | 9.15                 | 9.02   | 9.27    |
| tetrahydrofuran                             | 8.99               | 9.40                 | 9.38   | 9.54    |
| ethyl 4-methylphenyl selenide               | 7.25               | 7.10                 |        |         |
| 2,2-Dimethyl-2,3-dihydrobenzo[b]selenophene | 7.28               | 7.30                 |        |         |
| 2-(methylthio)tellurophene                  | 7.38               | 8.15                 |        |         |
| ethyl phenyl selenide                       | 7.47               | 7.60                 |        |         |
| methyl 2-methylphenyl selenide              | 7.49               | 7.50                 |        |         |
| benzo[b]tellurophene                        | 7.55               | 7.76                 |        |         |
| 2-(methylthio)selenophene                   | 7.56               | 8.75                 |        |         |
| selenoanisole                               | 7.59               | 7.40                 |        |         |
| 2-(methylthio)thiophene                     | 7.68               | 8.10                 |        |         |
| benzo[b]selenophene                         | 7.82               | 8.03                 |        |         |
| 2-methyltellurophene                        | 7.91               | 8.25                 |        |         |
| benzeneselenol                              | 8.00               | 7.70                 |        |         |

|                      |      |      |  |  |
|----------------------|------|------|--|--|
| resorcinol           | 8.10 | 8.20 |  |  |
| 2-acetyltellurophene | 8.36 | 8.60 |  |  |
| 2-acetylthiophene    | 8.94 | 9.20 |  |  |

Table of calculated vs experimental BDE values for reference compounds

| Phenol                         | Calc. BDE / kcal mol <sup>-1</sup> | Exp. BDE / kcal mol <sup>-1</sup> |
|--------------------------------|------------------------------------|-----------------------------------|
| unsubstituted                  | 86.98                              | 87.20                             |
| 4-methyl-                      | 84.12                              | 85.10                             |
| 4- <i>t</i> -butyl-            | 84.96                              | 84.20                             |
| 4-methoxy-                     | 80.94                              | 81.71                             |
| 2,6-dimethyl-                  | 82.32                              | 83.40                             |
| 2,6-dimethoxy-                 | 81.66                              | 82.06                             |
| 3,5-di- <i>t</i> -butyl-       | 85.11                              | 85.52                             |
| 3,5-dimethoxy-                 | 84.55                              | 85.60                             |
| 2,4,6-trimethyl-               | 80.36                              | 81.63                             |
| 2,4,6-trimethoxy-              | 77.79                              | 78.90                             |
| 2,3,6-trimethyl-4-methoxy-     | 76.61                              | 78.10                             |
| 2,3,5,6-tetramethyl-4-methoxy- | 79.07                              | 80.78                             |
| <b>6a</b>                      | 75.19                              | 77.15                             |

ii. Geometrical parameters and  $\Delta$ BDE values for compounds **4-7 a-d**.<sup>a</sup>

| Compound  | dihedral $\phi / ^\circ$ | bonding angle $\sigma / ^\circ$ | sum of aromatic angles $\lambda / ^\circ$ | $\Delta$ BDE / kcal mol <sup>-1</sup> |
|-----------|--------------------------|---------------------------------|-------------------------------------------|---------------------------------------|
| <b>4a</b> | 0.0                      | 87.8                            | 187.2                                     | -1.79                                 |
| <b>5a</b> | 9.4                      | 107.7                           | 221.5                                     | -1.46                                 |
| <b>6a</b> | 16.6                     | 118.5                           | 242.5                                     | 0.00                                  |
| <b>7a</b> | 0.0                      | 118.4                           | 234.0                                     | 5.75                                  |
| <b>4b</b> | 0.0                      | 72.2                            | 200.1                                     | -0.18                                 |
| <b>5b</b> | 16.2                     | 89.9                            | 226.6                                     | 0.81                                  |
| <b>6b</b> | 16.6                     | 102.3                           | 246.4                                     | 0.71                                  |
| <b>7b</b> | 0.0                      | 102.5                           | 236.7                                     | 6.14                                  |
| <b>4c</b> | 0.0                      | 69.3                            | 202.7                                     | 0.19                                  |
| <b>5c</b> | 16.5                     | 86.3                            | 227.6                                     | 1.14                                  |
| <b>6c</b> | 6.7                      | 100.3                           | 247.2                                     | 0.94                                  |
| <b>7c</b> | 0.0                      | 99.9                            | 237.6                                     | 6.28                                  |
| <b>4d</b> | 0.0                      | 65.3                            | 206.2                                     | 0.54                                  |
| <b>5d</b> | 16.1                     | 81.8                            | 229.1                                     | 1.37                                  |
| <b>6d</b> | 30.4                     | 97.4                            | 238.2                                     | 1.67                                  |
| <b>7d</b> | 0.0                      | 96.8                            | 238.8                                     | 7.04                                  |

<sup>a</sup> BDE values given relative to the calculated value for HPMC (**6a**).

iii. Absolute energies (a.u.), energy corrections (a.u.) and cartesian coordinates for compounds 4-6.

**4a antioxidant**

E(RB+HF-LYP) = -617.239609424 (LANL2DZ)

E(RB+HF-LYP) = -617.422407455 (LANL2DZdp)

Zero-point correction= 0.253377

Thermal correction to Enthalpy= 0.269845

|    |   |   |           |           |           |
|----|---|---|-----------|-----------|-----------|
| 1  | 6 | 0 | 0.354517  | 2.858704  | 0.000000  |
| 2  | 6 | 0 | -0.065560 | 1.407001  | 0.000000  |
| 3  | 6 | 0 | -0.984045 | -1.406088 | 0.000000  |
| 4  | 6 | 0 | 0.795867  | 0.318037  | 0.000000  |
| 5  | 6 | 0 | -1.441444 | 1.030042  | 0.000000  |
| 6  | 6 | 0 | -1.909183 | -0.309851 | 0.000000  |
| 7  | 6 | 0 | 0.343211  | -1.002593 | 0.000000  |
| 8  | 6 | 0 | 3.054046  | 0.011863  | 1.283334  |
| 9  | 8 | 0 | -2.344305 | 2.119263  | 0.000000  |
| 10 | 6 | 0 | -3.410788 | -0.556929 | 0.000000  |
| 11 | 8 | 0 | 1.632333  | -1.637519 | -0.000001 |
| 12 | 6 | 0 | -1.384486 | -2.867523 | 0.000000  |
| 13 | 1 | 0 | -3.276904 | 1.826885  | -0.000001 |
| 14 | 1 | 0 | 1.446064  | 2.952880  | 0.000010  |
| 15 | 1 | 0 | -0.042816 | 3.382832  | 0.878420  |
| 16 | 1 | 0 | -0.042799 | 3.382827  | -0.878430 |
| 17 | 1 | 0 | -3.898330 | -0.128574 | 0.890060  |
| 18 | 1 | 0 | -3.640012 | -1.624764 | 0.000008  |
| 19 | 1 | 0 | -3.898329 | -0.128586 | -0.890066 |
| 20 | 1 | 0 | -1.979626 | -3.129813 | 0.885552  |
| 21 | 1 | 0 | -0.491329 | -3.500393 | -0.000003 |
| 22 | 1 | 0 | -1.979630 | -3.129811 | -0.885551 |
| 23 | 6 | 0 | 2.252801  | -0.183456 | 0.000000  |
| 24 | 6 | 0 | 3.054047  | 0.011863  | -1.283334 |
| 25 | 1 | 0 | 2.441145  | -0.219162 | -2.160243 |
| 26 | 1 | 0 | 3.932648  | -0.644601 | -1.286001 |
| 27 | 1 | 0 | 3.398998  | 1.051841  | -1.361312 |
| 28 | 1 | 0 | 2.441144  | -0.219164 | 2.160243  |
| 29 | 1 | 0 | 3.398997  | 1.051841  | 1.361314  |
| 30 | 1 | 0 | 3.932648  | -0.644601 | 1.286001  |

**4a phenoxy radical**

E(ROB+HF-LYP) = -616.794678799

Thermal correction to Enthalpy= 0.256470

|    |   |   |           |           |           |
|----|---|---|-----------|-----------|-----------|
| 1  | 6 | 0 | -0.464296 | 2.881407  | 0.000000  |
| 2  | 6 | 0 | 0.005055  | 1.449920  | 0.000000  |
| 3  | 6 | 0 | 1.086197  | -1.347636 | 0.000000  |
| 4  | 6 | 0 | -0.787873 | 0.331258  | 0.000000  |
| 5  | 6 | 0 | 1.456499  | 1.158185  | 0.000000  |
| 6  | 6 | 0 | 1.958254  | -0.235459 | 0.000000  |
| 7  | 6 | 0 | -0.265282 | -0.980492 | 0.000000  |
| 8  | 6 | 0 | -3.026429 | -0.106857 | -1.284368 |
| 9  | 8 | 0 | 2.302034  | 2.140637  | 0.000000  |
| 10 | 6 | 0 | 3.460894  | -0.393744 | 0.000000  |
| 11 | 8 | 0 | -1.497278 | -1.669569 | 0.000000  |
| 12 | 6 | 0 | 1.522005  | -2.799126 | 0.000000  |
| 13 | 1 | 0 | -1.558024 | 2.947927  | -0.000002 |
| 14 | 1 | 0 | -0.074991 | 3.415207  | -0.876087 |
| 15 | 1 | 0 | -0.074993 | 3.415207  | 0.876088  |
| 16 | 1 | 0 | 3.898876  | 0.104255  | -0.874496 |
| 17 | 1 | 0 | 3.767993  | -1.443034 | 0.000000  |
| 18 | 1 | 0 | 3.898876  | 0.104255  | 0.874496  |
| 19 | 1 | 0 | 2.126266  | -3.038393 | -0.884549 |
| 20 | 1 | 0 | 0.648963  | -3.459620 | 0.000000  |
| 21 | 1 | 0 | 2.126266  | -3.038393 | 0.884549  |
| 22 | 6 | 0 | -2.218447 | -0.245666 | 0.000000  |
| 23 | 6 | 0 | -3.026429 | -0.106857 | 1.284368  |
| 24 | 1 | 0 | -2.401258 | -0.296330 | 2.162411  |
| 25 | 1 | 0 | -3.862640 | -0.815936 | 1.286772  |
| 26 | 1 | 0 | -3.435179 | 0.909486  | 1.360674  |
| 27 | 1 | 0 | -2.401258 | -0.296330 | -2.162411 |
| 28 | 1 | 0 | -3.435179 | 0.909486  | -1.360673 |
| 29 | 1 | 0 | -3.862640 | -0.815935 | -1.286772 |

**4a radical cation**

E(UB+HF-LYP) = -616.986015523

Zero-point correction= 0.253932

|    |   |   |           |           |           |
|----|---|---|-----------|-----------|-----------|
| 1  | 6 | 0 | 0.406234  | 2.882526  | 0.000000  |
| 2  | 6 | 0 | -0.007257 | 1.435521  | 0.000000  |
| 3  | 6 | 0 | -1.036871 | -1.395319 | 0.000000  |
| 4  | 6 | 0 | 0.816894  | 0.341387  | 0.000000  |
| 5  | 6 | 0 | -1.416175 | 1.053287  | 0.000000  |
| 6  | 6 | 0 | -1.928362 | -0.307214 | 0.000000  |
| 7  | 6 | 0 | 0.324109  | -0.990857 | 0.000000  |
| 8  | 6 | 0 | 3.063604  | -0.062237 | 1.289230  |
| 9  | 8 | 0 | -2.266598 | 2.116813  | 0.000000  |
| 10 | 6 | 0 | -3.431600 | -0.500782 | 0.000000  |
| 11 | 8 | 0 | 1.514277  | -1.659936 | 0.000000  |
| 12 | 6 | 0 | -1.427897 | -2.852671 | 0.000000  |
| 13 | 1 | 0 | -3.225249 | 1.902323  | 0.000000  |
| 14 | 1 | 0 | 1.494997  | 2.982376  | 0.000002  |
| 15 | 1 | 0 | 0.005763  | 3.403846  | 0.877924  |
| 16 | 1 | 0 | 0.005766  | 3.403845  | -0.877927 |
| 17 | 1 | 0 | -3.901560 | -0.060586 | 0.892213  |
| 18 | 1 | 0 | -3.697313 | -1.558686 | 0.000000  |
| 19 | 1 | 0 | -3.901560 | -0.060586 | -0.892212 |
| 20 | 1 | 0 | -2.025935 | -3.107040 | 0.884273  |
| 21 | 1 | 0 | -0.541022 | -3.492091 | -0.000001 |
| 22 | 1 | 0 | -2.025936 | -3.107040 | -0.884272 |
| 23 | 6 | 0 | 2.271224  | -0.178502 | 0.000000  |
| 24 | 6 | 0 | 3.063604  | -0.062236 | -1.289229 |
| 25 | 1 | 0 | 2.441301  | -0.241414 | -2.170894 |
| 26 | 1 | 0 | 3.893889  | -0.776132 | -1.288410 |
| 27 | 1 | 0 | 3.487596  | 0.948146  | -1.363634 |
| 28 | 1 | 0 | 2.441301  | -0.241414 | 2.170894  |
| 29 | 1 | 0 | 3.487596  | 0.948146  | 1.363634  |
| 30 | 1 | 0 | 3.893889  | -0.776132 | 1.288410  |

**4b antioxidant**

E(RB+HF-LYP) = -552.145325717 (LANL2DZ)

E(ROB+HF-LYP) = -552.324294912 (LANL2DZdp)

Zero-point correction= 0.251542

Thermal correction to Enthalpy= 0.268303

|    |    |   |           |           |           |
|----|----|---|-----------|-----------|-----------|
| 1  | 6  | 0 | 0.140908  | 2.888354  | -0.000031 |
| 2  | 6  | 0 | -0.258268 | 1.428566  | -0.000015 |
| 3  | 6  | 0 | -1.142688 | -1.360914 | -0.000042 |
| 4  | 6  | 0 | 0.636806  | 0.357175  | 0.000010  |
| 5  | 6  | 0 | -1.627987 | 1.052629  | -0.000052 |
| 6  | 6  | 0 | -2.086699 | -0.288431 | -0.000009 |
| 7  | 6  | 0 | 0.196377  | -0.974730 | -0.000031 |
| 8  | 6  | 0 | 2.877437  | 0.631317  | 1.281398  |
| 9  | 8  | 0 | -2.535174 | 2.134711  | 0.000043  |
| 10 | 6  | 0 | -3.586011 | -0.549063 | 0.000160  |
| 11 | 16 | 0 | 1.858612  | -1.802067 | -0.000062 |
| 12 | 6  | 0 | -1.546171 | -2.822922 | -0.000067 |
| 13 | 1  | 0 | 3.910812  | 0.263247  | 1.298787  |
| 14 | 1  | 0 | 1.229275  | 3.005103  | 0.000592  |
| 15 | 1  | 0 | -0.266432 | 3.405385  | 0.877980  |
| 16 | 1  | 0 | -0.265349 | 3.405067  | -0.878748 |
| 17 | 1  | 0 | -3.807544 | -1.618196 | 0.000423  |
| 18 | 1  | 0 | -4.077006 | -0.124582 | -0.889872 |
| 19 | 1  | 0 | -4.076798 | -0.124184 | 0.890108  |
| 20 | 1  | 0 | -2.141336 | -3.083983 | 0.885787  |
| 21 | 1  | 0 | -0.658238 | -3.463714 | -0.000662 |
| 22 | 1  | 0 | -2.142344 | -3.083698 | -0.885312 |
| 23 | 6  | 0 | 2.161059  | 0.188519  | 0.000037  |
| 24 | 6  | 0 | 2.877473  | 0.631462  | -1.281253 |
| 25 | 1  | 0 | 2.361554  | 0.260747  | -2.172470 |
| 26 | 1  | 0 | 3.910867  | 0.263448  | -1.298634 |
| 27 | 1  | 0 | 2.908959  | 1.730119  | -1.330244 |
| 28 | 1  | 0 | 2.361463  | 0.260546  | 2.172559  |
| 29 | 1  | 0 | 2.908988  | 1.729967  | 1.330497  |
| 30 | 1  | 0 | -3.466683 | 1.838339  | -0.000779 |

**4b phenoxy radical**

E(ROB+HF-LYP) = -551.693871113

| Thermal correction to Enthalpy= 0.254795 |    |   |           |           |           |
|------------------------------------------|----|---|-----------|-----------|-----------|
| 1                                        | 6  | 0 | -0.268525 | 2.914457  | 0.000002  |
| 2                                        | 6  | 0 | 0.189112  | 1.476956  | -0.000004 |
| 3                                        | 6  | 0 | 1.246850  | -1.289460 | -0.000001 |
| 4                                        | 6  | 0 | -0.634977 | 0.372185  | -0.000004 |
| 5                                        | 6  | 0 | 1.635897  | 1.195009  | -0.000013 |
| 6                                        | 6  | 0 | 2.133774  | -0.194782 | -0.000003 |
| 7                                        | 6  | 0 | -0.119341 | -0.949605 | -0.000002 |
| 8                                        | 6  | 0 | -2.890957 | 0.503460  | -1.281987 |
| 9                                        | 8  | 0 | 2.478980  | 2.178886  | 0.000000  |
| 10                                       | 6  | 0 | 3.635740  | -0.361323 | 0.000002  |
| 11                                       | 16 | 0 | -1.704521 | -1.860803 | 0.000000  |
| 12                                       | 6  | 0 | 1.696005  | -2.738271 | 0.000005  |
| 13                                       | 1  | 0 | -3.898990 | 0.071432  | -1.297741 |
| 14                                       | 1  | 0 | -1.360244 | 2.996632  | -0.000020 |
| 15                                       | 1  | 0 | 0.127031  | 3.444096  | -0.875844 |
| 16                                       | 1  | 0 | 0.126992  | 3.444077  | 0.875878  |
| 17                                       | 1  | 0 | 3.939626  | -1.411086 | -0.000025 |
| 18                                       | 1  | 0 | 4.075933  | 0.135325  | 0.874365  |
| 19                                       | 1  | 0 | 4.075944  | 0.135376  | -0.874326 |
| 20                                       | 1  | 0 | 2.302265  | -2.972639 | -0.884480 |
| 21                                       | 1  | 0 | 0.833355  | -3.413418 | 0.000026  |
| 22                                       | 1  | 0 | 2.302295  | -2.972623 | 0.884474  |
| 23                                       | 6  | 0 | -2.148258 | 0.114721  | 0.000001  |
| 24                                       | 6  | 0 | -2.890949 | 0.503463  | 1.281992  |
| 25                                       | 1  | 0 | -2.353400 | 0.168613  | 2.174515  |
| 26                                       | 1  | 0 | -3.898983 | 0.071439  | 1.297752  |
| 27                                       | 1  | 0 | -2.992063 | 1.597538  | 1.330763  |
| 28                                       | 1  | 0 | -2.353412 | 0.168611  | -2.174513 |
| 29                                       | 1  | 0 | -2.992075 | 1.597534  | -1.330759 |

**4b radical cation**

E(UB+HF-LYP) = -551.892750515

| Zero-point correction= 0.252107 |    |   |           |           |           |
|---------------------------------|----|---|-----------|-----------|-----------|
| 1                               | 6  | 0 | -0.211216 | 2.911796  | 0.000001  |
| 2                               | 6  | 0 | 0.194558  | 1.459786  | -0.000003 |
| 3                               | 6  | 0 | 1.186746  | -1.338606 | 0.000001  |
| 4                               | 6  | 0 | -0.661982 | 0.379110  | -0.000003 |
| 5                               | 6  | 0 | 1.592650  | 1.088109  | -0.000004 |
| 6                               | 6  | 0 | 2.096376  | -0.264862 | -0.000003 |
| 7                               | 6  | 0 | -0.184015 | -0.961621 | 0.000000  |
| 8                               | 6  | 0 | -2.918353 | 0.547343  | -1.286668 |
| 9                               | 8  | 0 | 2.445692  | 2.154261  | 0.000004  |
| 10                              | 6  | 0 | 3.598690  | -0.470369 | -0.000004 |
| 11                              | 16 | 0 | -1.730347 | -1.849798 | 0.000002  |
| 12                              | 6  | 0 | 1.601065  | -2.791593 | 0.000003  |
| 13                              | 1  | 0 | -3.929989 | 0.127341  | -1.294926 |
| 14                              | 1  | 0 | -1.298442 | 3.024427  | -0.000038 |
| 15                              | 1  | 0 | 0.193534  | 3.430327  | -0.877527 |
| 16                              | 1  | 0 | 0.193468  | 3.430304  | 0.877573  |
| 17                              | 1  | 0 | 3.860391  | -1.529026 | -0.000028 |
| 18                              | 1  | 0 | 4.071568  | -0.031971 | 0.891618  |
| 19                              | 1  | 0 | 4.071572  | -0.031931 | -0.891603 |
| 20                              | 1  | 0 | 2.203106  | -3.037026 | -0.883975 |
| 21                              | 1  | 0 | 0.730830  | -3.454753 | 0.000034  |
| 22                              | 1  | 0 | 2.203157  | -3.037010 | 0.883951  |
| 23                              | 6  | 0 | -2.183471 | 0.177859  | -0.000001 |
| 24                              | 6  | 0 | -2.918349 | 0.547349  | 1.286667  |
| 25                              | 1  | 0 | -2.388460 | 0.210775  | 2.182863  |
| 26                              | 1  | 0 | -3.929988 | 0.127353  | 1.294926  |
| 27                              | 1  | 0 | -3.015495 | 1.641482  | 1.338866  |
| 28                              | 1  | 0 | -2.388462 | 0.210769  | -2.182864 |
| 29                              | 1  | 0 | -3.015505 | 1.641475  | -1.338869 |
| 30                              | 1  | 0 | 3.402528  | 1.934333  | 0.000008  |

**4c antioxidant**

E(RB+HF-LYP) = -551.267770617 (LANL2DZ)

E(ROB+HF-LYP) = -551.438499535 (LANL2DZdp)

Zero-point correction=

0.250443

Thermal correction to Enthalpy=

0.267664

| Zero-point correction= 0.250443 |    |   |           |           |           |
|---------------------------------|----|---|-----------|-----------|-----------|
| 1                               | 6  | 0 | 0.897624  | 3.002997  | 0.000014  |
| 2                               | 6  | 0 | 0.926496  | 1.489525  | -0.000001 |
| 3                               | 6  | 0 | 1.117042  | -1.422871 | -0.000007 |
| 4                               | 6  | 0 | -0.206236 | 0.668764  | -0.000002 |
| 5                               | 6  | 0 | 2.166515  | 0.798839  | -0.000012 |
| 6                               | 6  | 0 | 2.292226  | -0.611640 | 0.000004  |
| 7                               | 6  | 0 | -0.095855 | -0.733389 | -0.000010 |
| 8                               | 6  | 0 | -2.269636 | 1.582393  | -1.280365 |
| 9                               | 8  | 0 | 3.306034  | 1.632265  | -0.000003 |
| 10                              | 6  | 0 | 3.685421  | -1.224020 | 0.000034  |
| 11                              | 34 | 0 | -2.019833 | -1.161703 | 0.000000  |
| 12                              | 6  | 0 | 1.164060  | -2.938837 | -0.000004 |
| 13                              | 1  | 0 | -3.365672 | 1.534473  | -1.301766 |
| 14                              | 1  | 0 | -0.127522 | 3.384379  | -0.000187 |
| 15                              | 1  | 0 | 1.419842  | 3.403519  | -0.878089 |
| 16                              | 1  | 0 | 1.419479  | 3.403499  | 0.878347  |
| 17                              | 1  | 0 | 3.644485  | -2.315080 | 0.000310  |
| 18                              | 1  | 0 | 4.264190  | -0.929233 | 0.889800  |
| 19                              | 1  | 0 | 4.264044  | -0.929680 | -0.889980 |
| 20                              | 1  | 0 | 1.681292  | -3.333343 | -0.885509 |
| 21                              | 1  | 0 | 0.150229  | -3.352936 | -0.000044 |
| 22                              | 1  | 0 | 1.681217  | -3.333343 | 0.885544  |
| 23                              | 6  | 0 | -1.717243 | 0.938508  | 0.000001  |
| 24                              | 6  | 0 | -2.269619 | 1.582402  | 1.280369  |
| 25                              | 1  | 0 | -1.883312 | 1.084536  | 2.175320  |
| 26                              | 1  | 0 | -3.365655 | 1.534510  | 1.301773  |
| 27                              | 1  | 0 | -1.978724 | 2.643021  | 1.321917  |
| 28                              | 1  | 0 | -1.883321 | 1.084539  | -2.175318 |
| 29                              | 1  | 0 | -1.978772 | 2.643020  | -1.321914 |
| 30                              | 1  | 0 | 4.139487  | 1.121876  | -0.000303 |

**4c phenoxy radical**

E(ROB+HF-LYP) = -550.807462674

| Thermal correction to Enthalpy= 0.254128 |    |   |           |           |           |
|------------------------------------------|----|---|-----------|-----------|-----------|
| 1                                        | 6  | 0 | 0.789626  | 3.068540  | 0.000003  |
| 2                                        | 6  | 0 | 0.868943  | 1.561256  | -0.000002 |
| 3                                        | 6  | 0 | 1.208205  | -1.371900 | -0.000001 |
| 4                                        | 6  | 0 | -0.211044 | 0.700397  | -0.000003 |
| 5                                        | 6  | 0 | 2.200917  | 0.932836  | -0.000003 |
| 6                                        | 6  | 0 | 2.340390  | -0.534764 | -0.000002 |
| 7                                        | 6  | 0 | -0.037230 | -0.711136 | -0.000002 |
| 8                                        | 6  | 0 | -2.323970 | 1.498780  | -1.281125 |
| 9                                        | 8  | 0 | 3.260659  | 1.678712  | -0.000002 |
| 10                                       | 6  | 0 | 3.754325  | -1.068991 | 0.000003  |
| 11                                       | 34 | 0 | -1.908038 | -1.231401 | 0.000001  |
| 12                                       | 6  | 0 | 1.290197  | -2.886831 | 0.000002  |
| 13                                       | 1  | 0 | -3.415458 | 1.390364  | -1.302205 |
| 14                                       | 1  | 0 | -0.244502 | 3.425912  | -0.000040 |
| 15                                       | 1  | 0 | 1.307185  | 3.480254  | -0.875640 |
| 16                                       | 1  | 0 | 1.307107  | 3.480246  | 0.875696  |
| 17                                       | 1  | 0 | 3.788599  | -2.161321 | -0.000033 |
| 18                                       | 1  | 0 | 4.303801  | -0.696912 | 0.874366  |
| 19                                       | 1  | 0 | 4.303829  | -0.696850 | -0.874316 |
| 20                                       | 1  | 0 | 1.820515  | -3.262794 | -0.884488 |
| 21                                       | 1  | 0 | 0.289023  | -3.332130 | -0.000005 |
| 22                                       | 1  | 0 | 1.820502  | -3.262791 | 0.884500  |
| 23                                       | 6  | 0 | -1.735112 | 0.893643  | -0.000001 |
| 24                                       | 6  | 0 | -2.323965 | 1.498784  | 1.281123  |
| 25                                       | 1  | 0 | -1.909068 | 1.026272  | 2.176941  |
| 26                                       | 1  | 0 | -3.415453 | 1.390374  | 1.302205  |
| 27                                       | 1  | 0 | -2.093326 | 2.573689  | 1.321625  |
| 28                                       | 1  | 0 | -1.909072 | 1.026269  | -2.176943 |
| 29                                       | 1  | 0 | -2.093337 | 2.573686  | -1.321629 |

**4c radical cation**

E(UB+HF-LYP) = -551.018811884

| Zero-point correction= 0.251090 |   |   |          |          |          |
|---------------------------------|---|---|----------|----------|----------|
| 1                               | 6 | 0 | 0.840652 | 3.046920 | 0.000000 |

|    |    |   |           |           |           |
|----|----|---|-----------|-----------|-----------|
| 2  | 6  | 0 | 0.869959  | 1.538318  | -0.000004 |
| 3  | 6  | 0 | 1.138773  | -1.407604 | -0.000003 |
| 4  | 6  | 0 | -0.234337 | 0.706333  | -0.000004 |
| 5  | 6  | 0 | 2.132216  | 0.839133  | -0.000003 |
| 6  | 6  | 0 | 2.287245  | -0.593013 | -0.000005 |
| 7  | 6  | 0 | -0.100686 | -0.712493 | -0.000002 |
| 8  | 6  | 0 | -2.337263 | 1.538948  | -1.285692 |
| 9  | 8  | 0 | 3.222429  | 1.664525  | 0.000005  |
| 10 | 6  | 0 | 3.692862  | -1.163895 | -0.000001 |
| 11 | 34 | 0 | -1.932103 | -1.216956 | 0.000003  |
| 12 | 6  | 0 | 1.192370  | -2.918431 | 0.000000  |
| 13 | 1  | 0 | -3.428792 | 1.445130  | -1.299447 |
| 14 | 1  | 0 | -0.182338 | 3.430423  | -0.000046 |
| 15 | 1  | 0 | 1.363079  | 3.446775  | -0.877398 |
| 16 | 1  | 0 | 1.362996  | 3.446767  | 0.877451  |
| 17 | 1  | 0 | 3.685748  | -2.254379 | -0.000042 |
| 18 | 1  | 0 | 4.259343  | -0.855279 | 0.891444  |
| 19 | 1  | 0 | 4.259377  | -0.855215 | -0.891402 |
| 20 | 1  | 0 | 1.717374  | -3.301806 | -0.883962 |
| 21 | 1  | 0 | 0.188723  | -3.354974 | -0.000024 |
| 22 | 1  | 0 | 1.717332  | -3.301802 | 0.883988  |
| 23 | 6  | 0 | -1.750226 | 0.952906  | -0.000002 |
| 24 | 6  | 0 | -2.337256 | 1.538956  | 1.285688  |
| 25 | 1  | 0 | -1.930367 | 1.067254  | 2.185446  |
| 26 | 1  | 0 | -3.428786 | 1.445147  | 1.299446  |
| 27 | 1  | 0 | -2.100725 | 2.612116  | 1.329506  |
| 28 | 1  | 0 | -1.930372 | 1.067247  | -2.185449 |
| 29 | 1  | 0 | -2.100741 | 2.612110  | -1.329514 |
| 30 | 1  | 0 | 4.094381  | 1.214311  | 0.000016  |

#### 4d antioxidant

E(RB+HF-LYP) = -550.091183384 (LANL2DZ)

E(ROB+HF-LYP) = -550.253496841 (LANL2DZdp)

Zero-point correction= 0.250311

Thermal correction to Enthalpy= 0.267482

|    |    |   |           |           |           |
|----|----|---|-----------|-----------|-----------|
| 1  | 6  | 0 | 1.684066  | 2.910110  | -0.000006 |
| 2  | 6  | 0 | 1.459525  | 1.411710  | 0.000005  |
| 3  | 6  | 0 | 1.197233  | -1.484872 | 0.000000  |
| 4  | 6  | 0 | 0.203707  | 0.784941  | 0.000011  |
| 5  | 6  | 0 | 2.577482  | 0.539633  | -0.000002 |
| 6  | 6  | 0 | 2.484765  | -0.872548 | 0.000006  |
| 7  | 6  | 0 | 0.096194  | -0.622216 | 0.000003  |
| 8  | 6  | 0 | -1.606020 | 2.135376  | -1.279377 |
| 9  | 8  | 0 | 3.832528  | 1.186312  | -0.000008 |
| 10 | 6  | 0 | 3.766421  | -1.693374 | 0.000019  |
| 11 | 52 | 0 | -2.035025 | -0.765150 | -0.000007 |
| 12 | 6  | 0 | 1.014871  | -2.991547 | -0.000003 |
| 13 | 1  | 0 | -2.683821 | 2.340520  | -1.304016 |
| 14 | 1  | 0 | 0.741180  | 3.462581  | 0.000173  |
| 15 | 1  | 0 | 2.267116  | 3.215534  | -0.878125 |
| 16 | 1  | 0 | 2.267437  | 3.215497  | 0.877909  |
| 17 | 1  | 0 | 3.558246  | -2.765100 | 0.000194  |
| 18 | 1  | 0 | 4.383190  | -1.490893 | 0.890000  |
| 19 | 1  | 0 | 4.383050  | -1.491148 | -0.890118 |
| 20 | 1  | 0 | 1.466107  | -3.460338 | -0.885429 |
| 21 | 1  | 0 | -0.049779 | -3.248948 | -0.000114 |
| 22 | 1  | 0 | 1.465915  | -3.460314 | 0.885536  |
| 23 | 6  | 0 | -1.219448 | 1.370576  | 0.000008  |
| 24 | 6  | 0 | -1.606038 | 2.135354  | 1.279403  |
| 25 | 1  | 0 | -1.341417 | 1.571617  | 2.179636  |
| 26 | 1  | 0 | -2.683844 | 2.340477  | 1.304039  |
| 27 | 1  | 0 | -1.081790 | 3.102814  | 1.313601  |
| 28 | 1  | 0 | -1.341405 | 1.571647  | -2.179616 |
| 29 | 1  | 0 | -1.081752 | 3.102827  | -1.313559 |
| 30 | 1  | 0 | 4.576078  | 0.551653  | -0.000097 |

#### 4d phenoxyl radical

E(ROB+HF-LYP) = -549.621797402

Thermal correction to Enthalpy= 0.253847

|   |   |   |          |          |           |
|---|---|---|----------|----------|-----------|
| 1 | 6 | 0 | 1.631205 | 2.974821 | -0.000007 |
| 2 | 6 | 0 | 1.431462 | 1.477679 | 0.000001  |

|    |    |   |           |           |           |
|----|----|---|-----------|-----------|-----------|
| 3  | 6  | 0 | 1.260745  | -1.458066 | 0.000000  |
| 4  | 6  | 0 | 0.209332  | 0.825483  | 0.000003  |
| 5  | 6  | 0 | 2.635691  | 0.631470  | 0.000003  |
| 6  | 6  | 0 | 2.521904  | -0.835572 | -0.000001 |
| 7  | 6  | 0 | 0.137066  | -0.600282 | 0.000002  |
| 8  | 6  | 0 | -1.649839 | 2.109292  | -1.279690 |
| 9  | 8  | 0 | 3.807483  | 1.185417  | -0.000004 |
| 10 | 6  | 0 | 3.821969  | -1.606886 | -0.000002 |
| 11 | 52 | 0 | -1.959958 | -0.810068 | 0.000000  |
| 12 | 6  | 0 | 1.086918  | -2.966136 | -0.000002 |
| 13 | 1  | 0 | -2.733917 | 2.277124  | -1.304400 |
| 14 | 1  | 0 | 0.684397  | 3.521581  | 0.000059  |
| 15 | 1  | 0 | 2.217369  | 3.281882  | -0.875430 |
| 16 | 1  | 0 | 2.217492  | 3.281873  | 0.875336  |
| 17 | 1  | 0 | 3.666899  | -2.688735 | -0.000079 |
| 18 | 1  | 0 | 4.427528  | -1.336045 | 0.874539  |
| 19 | 1  | 0 | 4.427597  | -1.335925 | -0.874456 |
| 20 | 1  | 0 | 1.545731  | -3.427199 | -0.884339 |
| 21 | 1  | 0 | 0.024990  | -3.237782 | 0.000014  |
| 22 | 1  | 0 | 1.545760  | -3.427205 | 0.884316  |
| 23 | 6  | 0 | -1.234077 | 1.363517  | 0.000003  |
| 24 | 6  | 0 | -1.649844 | 2.109287  | 1.279698  |
| 25 | 1  | 0 | -1.363121 | 1.558570  | 2.181253  |
| 26 | 1  | 0 | -2.733923 | 2.277111  | 1.304407  |
| 27 | 1  | 0 | -1.160460 | 3.094365  | 1.311964  |
| 28 | 1  | 0 | -1.363118 | 1.558576  | -2.181247 |
| 29 | 1  | 0 | -1.160448 | 3.094367  | -1.311953 |

#### 4d radical cation

E(UB+HF-LYP) = -549.847772828

Zero-point correction= 0.250929

|    |    |   |           |           |           |
|----|----|---|-----------|-----------|-----------|
| 1  | 6  | 0 | 1.661579  | 2.945158  | -0.000003 |
| 2  | 6  | 0 | 1.424804  | 1.453280  | 0.000001  |
| 3  | 6  | 0 | 1.192669  | -1.480921 | 0.000001  |
| 4  | 6  | 0 | 0.186111  | 0.826065  | 0.000003  |
| 5  | 6  | 0 | 2.550723  | 0.559237  | 0.000000  |
| 6  | 6  | 0 | 2.464378  | -0.873773 | 0.000000  |
| 7  | 6  | 0 | 0.079565  | -0.597810 | 0.000002  |
| 8  | 6  | 0 | -1.660288 | 2.134691  | -1.284126 |
| 9  | 8  | 0 | 3.766842  | 1.192616  | -0.000002 |
| 10 | 6  | 0 | 3.754161  | -1.673653 | 0.000002  |
| 11 | 52 | 0 | -1.981425 | -0.797526 | -0.000003 |
| 12 | 6  | 0 | 1.003625  | -2.982229 | 0.000002  |
| 13 | 1  | 0 | -2.740653 | 2.317842  | -1.300167 |
| 14 | 1  | 0 | 0.725701  | 3.507914  | 0.000064  |
| 15 | 1  | 0 | 2.247550  | 3.245012  | -0.877169 |
| 16 | 1  | 0 | 2.247673  | 3.244998  | 0.877083  |
| 17 | 1  | 0 | 3.565446  | -2.747739 | -0.000056 |
| 18 | 1  | 0 | 4.364418  | -1.463555 | 0.891225  |
| 19 | 1  | 0 | 4.364474  | -1.463466 | -0.891161 |
| 20 | 1  | 0 | 1.459142  | -3.446551 | -0.883726 |
| 21 | 1  | 0 | -0.057355 | -3.253184 | 0.000024  |
| 22 | 1  | 0 | 1.459181  | -3.446554 | 0.883708  |
| 23 | 6  | 0 | -1.239032 | 1.407688  | 0.000003  |
| 24 | 6  | 0 | -1.660295 | 2.134679  | 1.284137  |
| 25 | 1  | 0 | -1.381772 | 1.585998  | 2.189462  |
| 26 | 1  | 0 | -2.740659 | 2.317836  | 1.300170  |
| 27 | 1  | 0 | -1.164226 | 3.115580  | 1.321518  |
| 28 | 1  | 0 | -1.381754 | 1.586021  | -2.189455 |
| 29 | 1  | 0 | -1.164222 | 3.115594  | -1.321491 |
| 30 | 1  | 0 | 4.548413  | 0.600199  | 0.000006  |

#### 5a antioxidant

E(RB+HF-LYP) = -656.594996547 (LANL2DZ)

E(ROB+HF-LYP) = -656.786666463 (LANL2DZdp)

Zero-point correction= 0.283252

Thermal correction to Enthalpy= 0.300548

|   |   |   |           |           |           |
|---|---|---|-----------|-----------|-----------|
| 1 | 6 | 0 | -1.010529 | 2.974792  | -0.046127 |
| 2 | 6 | 0 | -0.908486 | 1.459438  | -0.041015 |
| 3 | 6 | 0 | -0.777543 | -1.422370 | -0.051107 |
| 4 | 6 | 0 | 0.321017  | 0.788406  | -0.091455 |

|    |   |   |           |           |           |
|----|---|---|-----------|-----------|-----------|
| 5  | 6 | 0 | -2.074334 | 0.651061  | 0.009058  |
| 6  | 6 | 0 | -2.035199 | -0.761061 | 0.002533  |
| 7  | 6 | 0 | 0.364850  | -0.613847 | -0.095906 |
| 8  | 6 | 0 | 1.740521  | 1.323278  | -0.193046 |
| 9  | 8 | 0 | -3.358979 | 1.244561  | 0.067377  |
| 10 | 6 | 0 | -3.322628 | -1.561018 | 0.053579  |
| 11 | 8 | 0 | 1.678933  | -1.115894 | -0.162348 |
| 12 | 6 | 0 | -0.661675 | -2.932732 | -0.061975 |
| 13 | 1 | 0 | 1.969619  | 2.088480  | 0.559014  |
| 14 | 1 | 0 | 1.929615  | 1.765411  | -1.181843 |
| 15 | 6 | 0 | 2.625937  | 0.048020  | 0.026494  |
| 16 | 6 | 0 | 3.737108  | -0.118980 | -1.013636 |
| 17 | 6 | 0 | 3.152781  | -0.043199 | 1.469034  |
| 18 | 1 | 0 | -3.308420 | 2.220606  | 0.062066  |
| 19 | 1 | 0 | -1.492712 | 3.360176  | 0.865913  |
| 20 | 1 | 0 | -1.582937 | 3.346343  | -0.910424 |
| 21 | 1 | 0 | -0.019924 | 3.435201  | -0.101345 |
| 22 | 1 | 0 | -3.352139 | -2.209800 | 0.940477  |
| 23 | 1 | 0 | -3.417004 | -2.216256 | -0.823921 |
| 24 | 1 | 0 | -4.189735 | -0.899190 | 0.083604  |
| 25 | 1 | 0 | -1.136783 | -3.378358 | 0.823098  |
| 26 | 1 | 0 | 0.388400  | -3.236043 | -0.077571 |
| 27 | 1 | 0 | -1.156909 | -3.366822 | -0.942064 |
| 28 | 1 | 0 | 3.317876  | -0.122380 | -2.026197 |
| 29 | 1 | 0 | 4.267739  | -1.065661 | -0.859273 |
| 30 | 1 | 0 | 4.462078  | 0.702290  | -0.936900 |
| 31 | 1 | 0 | 2.328880  | 0.052214  | 2.186691  |
| 32 | 1 | 0 | 3.881435  | 0.754511  | 1.666823  |
| 33 | 1 | 0 | 3.640362  | -1.010782 | 1.633034  |

|    |   |   |           |           |           |
|----|---|---|-----------|-----------|-----------|
| 3  | 6 | 0 | -0.810096 | -1.437992 | -0.000463 |
| 4  | 6 | 0 | 0.326819  | 0.830854  | -0.000293 |
| 5  | 6 | 0 | -2.062846 | 0.666471  | -0.000563 |
| 6  | 6 | 0 | -2.045307 | -0.778357 | -0.000325 |
| 7  | 6 | 0 | 0.352006  | -0.606816 | -0.000503 |
| 8  | 6 | 0 | 1.751725  | 1.343427  | -0.000378 |
| 9  | 8 | 0 | -3.304748 | 1.231150  | -0.000225 |
| 10 | 6 | 0 | -3.344720 | -1.548788 | 0.001055  |
| 11 | 8 | 0 | 1.602800  | -1.099989 | -0.000830 |
| 12 | 6 | 0 | -0.681724 | -2.941329 | -0.000554 |
| 13 | 1 | 0 | 1.957609  | 1.959921  | 0.882778  |
| 14 | 1 | 0 | 1.957711  | 1.959263  | -0.883962 |
| 15 | 6 | 0 | 2.647855  | 0.059846  | 0.000197  |
| 16 | 6 | 0 | 3.465509  | -0.135911 | -1.278953 |
| 17 | 6 | 0 | 3.463127  | -0.135859 | 1.280899  |
| 18 | 1 | 0 | -3.323997 | 2.212877  | -0.000166 |
| 19 | 1 | 0 | -1.535341 | 3.376142  | 0.891216  |
| 20 | 1 | 0 | -1.536183 | 3.376519  | -0.890558 |
| 21 | 1 | 0 | -0.023308 | 3.486568  | -0.000457 |
| 22 | 1 | 0 | -3.418775 | -2.182824 | 0.894700  |
| 23 | 1 | 0 | -3.400111 | -2.218184 | -0.867366 |
| 24 | 1 | 0 | -4.209498 | -0.885812 | -0.020297 |
| 25 | 1 | 0 | -1.185023 | -3.379071 | 0.871264  |
| 26 | 1 | 0 | 0.364689  | -3.252580 | 0.015752  |
| 27 | 1 | 0 | -1.155308 | -3.376180 | -0.890585 |
| 28 | 1 | 0 | 2.840520  | -0.047487 | -2.174789 |
| 29 | 1 | 0 | 3.946163  | -1.119098 | -1.283874 |
| 30 | 1 | 0 | 4.250485  | 0.628526  | -1.330062 |
| 31 | 1 | 0 | 2.836309  | -0.048284 | 2.175561  |
| 32 | 1 | 0 | 4.247279  | 0.629317  | 1.333842  |
| 33 | 1 | 0 | 3.944709  | -1.118577 | 1.286496  |

#### 5a phenoxy radical

E(ROB+HF-LYP) = -656.158559072

Thermal correction to Enthalpy= 0.287327

|    |   |   |           |           |           |
|----|---|---|-----------|-----------|-----------|
| 1  | 6 | 0 | -0.990893 | 3.026576  | -0.000926 |
| 2  | 6 | 0 | -0.895088 | 1.520752  | -0.000586 |
| 3  | 6 | 0 | -0.854572 | -1.400376 | -0.000109 |
| 4  | 6 | 0 | 0.299972  | 0.825336  | -0.000821 |
| 5  | 6 | 0 | -2.141676 | 0.742608  | -0.000204 |
| 6  | 6 | 0 | -2.085413 | -0.726784 | 0.000182  |
| 7  | 6 | 0 | 0.308405  | -0.595464 | -0.000593 |
| 8  | 6 | 0 | 1.736657  | 1.323376  | -0.001548 |
| 9  | 8 | 0 | -3.282887 | 1.362591  | -0.000101 |
| 10 | 6 | 0 | -3.393134 | -1.483765 | 0.001016  |
| 11 | 8 | 0 | 1.587345  | -1.121222 | -0.000891 |
| 12 | 6 | 0 | -0.745968 | -2.912012 | -0.000195 |
| 13 | 1 | 0 | 1.954715  | 1.937207  | 0.881224  |
| 14 | 1 | 0 | 1.954468  | 1.934679  | -0.886159 |
| 15 | 6 | 0 | 2.602281  | 0.016815  | 0.000268  |
| 16 | 6 | 0 | 3.436555  | -0.159243 | -1.274591 |
| 17 | 6 | 0 | 3.432329  | -0.158067 | 1.278108  |
| 18 | 1 | 0 | -1.551951 | 3.377210  | 0.874593  |
| 19 | 1 | 0 | -1.552669 | 3.376753  | -0.876163 |
| 20 | 1 | 0 | -0.003212 | 3.499717  | -0.001460 |
| 21 | 1 | 0 | -3.481451 | -2.128116 | 0.887649  |
| 22 | 1 | 0 | -3.476642 | -2.138917 | -0.878004 |
| 23 | 1 | 0 | -4.229108 | -0.780999 | -0.004974 |
| 24 | 1 | 0 | -1.245685 | -3.346190 | 0.876406  |
| 25 | 1 | 0 | 0.300496  | -3.227379 | 0.010602  |
| 26 | 1 | 0 | -1.226161 | -3.344624 | -0.888570 |
| 27 | 1 | 0 | 2.804618  | -0.079007 | -2.166711 |
| 28 | 1 | 0 | 3.921823  | -1.141644 | -1.283187 |
| 29 | 1 | 0 | 4.213897  | 0.614040  | -1.328919 |
| 30 | 1 | 0 | 2.797470  | -0.076687 | 2.168056  |
| 31 | 1 | 0 | 4.209690  | 0.615077  | 1.334175  |
| 32 | 1 | 0 | 3.917298  | -1.140587 | 1.289371  |

#### 5a radical cation

E(UB+HF-LYP) = -656.348266316

Zero-point correction= 0.284109

|   |   |   |           |          |           |
|---|---|---|-----------|----------|-----------|
| 1 | 6 | 0 | -1.005649 | 3.008906 | 0.000009  |
| 2 | 6 | 0 | -0.880422 | 1.500494 | -0.000304 |

#### 5b antioxidant

E(RB+HF-LYP) = -591.481843503 (LANL2DZ)

E(ROB+HF-LYP) = -591.671296585 (LANL2DZdp)

Zero-point correction= 0.281137

Thermal correction to Enthalpy= 0.298681

|    |    |   |           |           |           |
|----|----|---|-----------|-----------|-----------|
| 1  | 6  | 0 | 1.000609  | 3.006195  | -0.162820 |
| 2  | 6  | 0 | 0.983365  | 1.486382  | -0.110600 |
| 3  | 6  | 0 | 1.069047  | -1.381136 | -0.043874 |
| 4  | 6  | 0 | -0.201754 | 0.732890  | -0.194357 |
| 5  | 6  | 0 | 2.203444  | 0.773608  | 0.010889  |
| 6  | 6  | 0 | 2.274438  | -0.633758 | 0.043340  |
| 7  | 6  | 0 | -0.141898 | -0.676918 | -0.159272 |
| 8  | 6  | 0 | -1.607398 | 1.285700  | -0.384668 |
| 9  | 8  | 0 | 3.431679  | 1.464765  | 0.107593  |
| 10 | 6  | 0 | 3.619410  | -1.325505 | 0.166768  |
| 11 | 16 | 0 | -1.803552 | -1.463110 | -0.308827 |
| 12 | 6  | 0 | 1.098464  | -2.897802 | -0.025085 |
| 13 | 1  | 0 | -1.780801 | 1.480284  | -1.454857 |
| 14 | 1  | 0 | -1.767124 | 2.231476  | 0.149553  |
| 15 | 6  | 0 | -2.641646 | 0.238284  | 0.115757  |
| 16 | 6  | 0 | -2.829882 | 0.322681  | 1.644445  |
| 17 | 6  | 0 | -3.986050 | 0.333195  | -0.622408 |
| 18 | 1  | 0 | 3.312807  | 2.433363  | 0.054459  |
| 19 | 1  | 0 | 1.604372  | 3.379166  | -1.005203 |
| 20 | 1  | 0 | 1.406705  | 3.445899  | 0.761705  |
| 21 | 1  | 0 | -0.003439 | 3.415703  | -0.295168 |
| 22 | 1  | 0 | 3.752010  | -2.080504 | -0.619387 |
| 23 | 1  | 0 | 3.714405  | -1.844200 | 1.131873  |
| 24 | 1  | 0 | 4.432537  | -0.601247 | 0.093590  |
| 25 | 1  | 0 | 1.381139  | -3.303270 | -1.007958 |
| 26 | 1  | 0 | 0.116555  | -3.309469 | 0.231150  |
| 27 | 1  | 0 | 1.825457  | -3.278476 | 0.701649  |
| 28 | 1  | 0 | -1.869196 | 0.250428  | 2.166779  |
| 29 | 1  | 0 | -3.475183 | -0.486261 | 2.005253  |
| 30 | 1  | 0 | -3.298223 | 1.282271  | 1.911836  |
| 31 | 1  | 0 | -3.854892 | 0.220974  | -1.704639 |
| 32 | 1  | 0 | -4.448864 | 1.311902  | -0.429143 |
| 33 | 1  | 0 | -4.685765 | -0.439279 | -0.279689 |

#### 5b phenoxy radical

E(ROB+HF-LYP) = -591.040229917

Thermal correction to Enthalpy= 0.286123

|    |    |   |           |           |           |
|----|----|---|-----------|-----------|-----------|
| 1  | 6  | 0 | 0.886212  | 3.062569  | -0.148926 |
| 2  | 6  | 0 | 0.943324  | 1.551939  | -0.101447 |
| 3  | 6  | 0 | 1.161440  | -1.345035 | -0.041942 |
| 4  | 6  | 0 | -0.191445 | 0.757138  | -0.182597 |
| 5  | 6  | 0 | 2.250211  | 0.897158  | 0.019076  |
| 6  | 6  | 0 | 2.327944  | -0.569039 | 0.041276  |
| 7  | 6  | 0 | -0.081571 | -0.665224 | -0.144864 |
| 8  | 6  | 0 | -1.610569 | 1.260810  | -0.385177 |
| 9  | 8  | 0 | 3.331621  | 1.611712  | 0.099815  |
| 10 | 6  | 0 | 3.699498  | -1.196731 | 0.156538  |
| 11 | 16 | 0 | -1.692812 | -1.496834 | -0.262881 |
| 12 | 6  | 0 | 1.214544  | -2.861900 | -0.036186 |
| 13 | 1  | 0 | -1.774655 | 1.454146  | -1.456637 |
| 14 | 1  | 0 | -1.790996 | 2.205155  | 0.143952  |
| 15 | 6  | 0 | -2.618545 | 0.185191  | 0.102316  |
| 16 | 6  | 0 | -2.851649 | 0.275696  | 1.624133  |
| 17 | 6  | 0 | -3.941595 | 0.202552  | -0.677904 |
| 18 | 1  | 0 | 1.898631  | 3.470387  | -0.107829 |
| 19 | 1  | 0 | 0.314270  | 3.468664  | 0.697892  |
| 20 | 1  | 0 | 0.400934  | 3.417475  | -1.068925 |
| 21 | 1  | 0 | 3.886208  | -1.909028 | -0.658373 |
| 22 | 1  | 0 | 3.808995  | -1.750155 | 1.100739  |
| 23 | 1  | 0 | 4.463718  | -0.417265 | 0.127979  |
| 24 | 1  | 0 | 1.365413  | -3.256041 | -1.051905 |
| 25 | 1  | 0 | 0.282658  | -3.292499 | 0.347098  |
| 26 | 1  | 0 | 2.037884  | -3.233448 | 0.582091  |
| 27 | 1  | 0 | -1.903960 | 0.266675  | 2.174375  |
| 28 | 1  | 0 | -3.462589 | -0.560731 | 1.982038  |
| 29 | 1  | 0 | -3.378884 | 1.211475  | 1.861116  |
| 30 | 1  | 0 | -3.773717 | 0.079128  | -1.753723 |
| 31 | 1  | 0 | -4.450582 | 1.163533  | -0.517070 |
| 32 | 1  | 0 | -4.618096 | -0.592553 | -0.340999 |

### 5b radical cation

E(UB+HF-LYP) = -591.233281326

Zero-point correction= 0.281788

|    |    |   |           |           |           |
|----|----|---|-----------|-----------|-----------|
| 1  | 6  | 0 | 0.968247  | 3.038720  | -0.133909 |
| 2  | 6  | 0 | 0.946204  | 1.523278  | -0.080821 |
| 3  | 6  | 0 | 1.110310  | -1.384701 | -0.044475 |
| 4  | 6  | 0 | -0.215145 | 0.764732  | -0.143358 |
| 5  | 6  | 0 | 2.187308  | 0.802232  | 0.018725  |
| 6  | 6  | 0 | 2.290323  | -0.629867 | 0.029750  |
| 7  | 6  | 0 | -0.130426 | -0.675168 | -0.114861 |
| 8  | 6  | 0 | -1.622839 | 1.300025  | -0.323126 |
| 9  | 8  | 0 | 3.374901  | 1.473002  | 0.100201  |
| 10 | 6  | 0 | 3.648787  | -1.286992 | 0.123198  |
| 11 | 16 | 0 | -1.712981 | -1.472397 | -0.196422 |
| 12 | 6  | 0 | 1.160957  | -2.896734 | -0.050275 |
| 13 | 1  | 0 | -1.767379 | 1.573394  | -1.378649 |
| 14 | 1  | 0 | -1.798051 | 2.205139  | 0.269164  |
| 15 | 6  | 0 | -2.673465 | 0.228136  | 0.078929  |
| 16 | 6  | 0 | -3.026863 | 0.288363  | 1.580412  |
| 17 | 6  | 0 | -3.922238 | 0.230033  | -0.814561 |
| 18 | 1  | 0 | 3.307555  | 2.451941  | 0.094106  |
| 19 | 1  | 0 | 1.566918  | 3.406906  | -0.980102 |
| 20 | 1  | 0 | 1.375915  | 3.475137  | 0.790020  |
| 21 | 1  | 0 | -0.032593 | 3.454225  | -0.262297 |
| 22 | 1  | 0 | 3.770943  | -2.048421 | -0.656319 |
| 23 | 1  | 0 | 3.770997  | -1.794925 | 1.090213  |
| 24 | 1  | 0 | 4.453230  | -0.557897 | 0.025242  |
| 25 | 1  | 0 | 1.533228  | -3.269254 | -1.014753 |
| 26 | 1  | 0 | 0.180960  | -3.349825 | 0.122227  |
| 27 | 1  | 0 | 1.842287  | -3.272787 | 0.720716  |
| 28 | 1  | 0 | -2.133821 | 0.306450  | 2.215399  |
| 29 | 1  | 0 | -3.647940 | -0.561370 | 1.882826  |
| 30 | 1  | 0 | -3.602002 | 1.204665  | 1.770059  |
| 31 | 1  | 0 | -3.672014 | 0.103224  | -1.873473 |
| 32 | 1  | 0 | -4.438772 | 1.192382  | -0.700515 |
| 33 | 1  | 0 | -4.627941 | -0.556995 | -0.526483 |

### 5c antioxidant

E(RB+HF-LYP) = -590.600953467 (LANL2DZ)

E(ROB+HF-LYP) = -590.781507241 (LANL2DZdp)

Zero-point correction= 0.280088

Thermal correction to Enthalpy= 0.298023

|    |    |   |           |           |           |
|----|----|---|-----------|-----------|-----------|
| 1  | 6  | 0 | -1.567846 | 3.039065  | -0.241987 |
| 2  | 6  | 0 | -1.398820 | 1.530434  | -0.139405 |
| 3  | 6  | 0 | -1.214682 | -1.325257 | 0.015237  |
| 4  | 6  | 0 | -0.143400 | 0.893190  | -0.192280 |
| 5  | 6  | 0 | -2.547303 | 0.710144  | -0.003346 |
| 6  | 6  | 0 | -2.487038 | -0.695653 | 0.072814  |
| 7  | 6  | 0 | -0.070186 | -0.516973 | -0.115305 |
| 8  | 6  | 0 | 1.192244  | 1.598840  | -0.390246 |
| 9  | 8  | 0 | -3.835467 | 1.285672  | 0.062480  |
| 10 | 6  | 0 | -3.763434 | -1.505228 | 0.209928  |
| 11 | 34 | 0 | 1.772061  | -1.182303 | -0.233061 |
| 12 | 6  | 0 | -1.105599 | -2.837556 | 0.079681  |
| 13 | 1  | 0 | 1.215268  | 2.591068  | 0.080192  |
| 14 | 1  | 0 | 1.364613  | 1.745413  | -1.468599 |
| 15 | 6  | 0 | 2.353902  | 0.745120  | 0.190546  |
| 16 | 6  | 0 | 3.697797  | 1.048456  | -0.493711 |
| 17 | 6  | 0 | 2.457507  | 0.910016  | 1.721766  |
| 18 | 1  | 0 | -3.806431 | 2.259771  | -0.010646 |
| 19 | 1  | 0 | -2.023411 | 3.465578  | 0.665645  |
| 20 | 1  | 0 | -2.199655 | 3.320632  | -1.099202 |
| 21 | 1  | 0 | -0.610555 | 3.544870  | -0.383565 |
| 22 | 1  | 0 | -3.823759 | -1.992143 | 1.194212  |
| 23 | 1  | 0 | -3.815529 | -2.298764 | -0.547015 |
| 24 | 1  | 0 | -4.638631 | -0.862467 | 0.100248  |
| 25 | 1  | 0 | -1.827839 | -3.267228 | 0.782935  |
| 26 | 1  | 0 | -0.103757 | -3.149030 | 0.396591  |
| 27 | 1  | 0 | -1.299590 | -3.293905 | -0.902542 |
| 28 | 1  | 0 | 3.641622  | 0.888528  | -1.576641 |
| 29 | 1  | 0 | 4.503511  | 0.419407  | -0.094530 |
| 30 | 1  | 0 | 3.977564  | 2.097469  | -0.314273 |
| 31 | 1  | 0 | 1.502279  | 0.691297  | 2.211840  |
| 32 | 1  | 0 | 2.742956  | 1.945502  | 1.966231  |
| 33 | 1  | 0 | 3.216169  | 0.239326  | 2.141191  |

### 5c phenoxy radical

E(ROB+HF-LYP) = -590.149904798

Thermal correction to Enthalpy= 0.285461

|    |    |   |           |           |           |
|----|----|---|-----------|-----------|-----------|
| 1  | 6  | 0 | -1.457599 | 3.111862  | -0.211786 |
| 2  | 6  | 0 | -1.361599 | 1.604303  | -0.125628 |
| 3  | 6  | 0 | -1.297872 | -1.293335 | 0.001593  |
| 4  | 6  | 0 | -0.149763 | 0.926053  | -0.181637 |
| 5  | 6  | 0 | -2.598836 | 0.828574  | 0.006487  |
| 6  | 6  | 0 | -2.536679 | -0.638621 | 0.062269  |
| 7  | 6  | 0 | -0.121945 | -0.499604 | -0.109198 |
| 8  | 6  | 0 | 1.202163  | 1.588298  | -0.395432 |
| 9  | 8  | 0 | -3.744115 | 1.437283  | 0.068235  |
| 10 | 6  | 0 | -3.848051 | -1.385881 | 0.186642  |
| 11 | 34 | 0 | 1.670168  | -1.219098 | -0.187380 |
| 12 | 6  | 0 | -1.176999 | -2.805990 | 0.047276  |
| 13 | 1  | 0 | 1.247194  | 2.578687  | 0.076174  |
| 14 | 1  | 0 | 1.354699  | 1.740002  | -1.475648 |
| 15 | 6  | 0 | 2.350639  | 0.701606  | 0.158132  |
| 16 | 6  | 0 | 3.678867  | 0.922111  | -0.585197 |
| 17 | 6  | 0 | 2.520756  | 0.885825  | 1.681247  |
| 18 | 1  | 0 | -0.932138 | 3.596087  | 0.624041  |
| 19 | 1  | 0 | -2.506467 | 3.415125  | -0.180736 |
| 20 | 1  | 0 | -1.009372 | 3.491057  | -1.140805 |
| 21 | 1  | 0 | -3.893458 | -1.968846 | 1.117366  |
| 22 | 1  | 0 | -3.993118 | -2.087827 | -0.645697 |
| 23 | 1  | 0 | -4.674425 | -0.672029 | 0.188634  |
| 24 | 1  | 0 | -2.123458 | -3.288277 | 0.300829  |
| 25 | 1  | 0 | -0.429700 | -3.116310 | 0.790455  |
| 26 | 1  | 0 | -0.851011 | -3.204474 | -0.924775 |
| 27 | 1  | 0 | 3.574760  | 0.739997  | -1.660881 |
| 28 | 1  | 0 | 4.471839  | 0.268981  | -0.199741 |
| 29 | 1  | 0 | 4.009213  | 1.961659  | -0.444322 |

|    |   |   |          |          |          |
|----|---|---|----------|----------|----------|
| 30 | 1 | 0 | 1.572915 | 0.741950 | 2.211934 |
| 31 | 1 | 0 | 2.879735 | 1.905374 | 1.889233 |
| 32 | 1 | 0 | 3.251514 | 0.178708 | 2.090361 |

|    |   |   |           |           |           |
|----|---|---|-----------|-----------|-----------|
| 26 | 1 | 0 | -0.235652 | -3.021047 | 0.731410  |
| 27 | 1 | 0 | -0.982608 | -3.244200 | -0.859313 |
| 28 | 1 | 0 | 3.362841  | 1.508662  | -1.498187 |
| 29 | 1 | 0 | 4.232695  | 1.242543  | 0.029194  |
| 30 | 1 | 0 | 3.420446  | 2.789133  | -0.264031 |
| 31 | 1 | 0 | 1.135618  | 1.068234  | 2.227330  |
| 32 | 1 | 0 | 2.158402  | 2.499959  | 1.956781  |
| 33 | 1 | 0 | 2.901700  | 0.908020  | 2.235127  |

**5c radical cation**

E(UB+HF-LYP) = -590.355317859  
 Zero-point correction= 0.280873

|    |    |   |           |           |           |
|----|----|---|-----------|-----------|-----------|
| 1  | 6  | 0 | -1.514274 | 3.085181  | -0.186760 |
| 2  | 6  | 0 | -1.349641 | 1.579063  | -0.101043 |
| 3  | 6  | 0 | -1.250213 | -1.322613 | -0.007128 |
| 4  | 6  | 0 | -0.119598 | 0.929144  | -0.145276 |
| 5  | 6  | 0 | -2.520783 | 0.754843  | 0.010157  |
| 6  | 6  | 0 | -2.495614 | -0.677066 | 0.050233  |
| 7  | 6  | 0 | -0.074368 | -0.512074 | -0.089688 |
| 8  | 6  | 0 | 1.220945  | 1.616907  | -0.335866 |
| 9  | 8  | 0 | -3.765331 | 1.320319  | 0.075813  |
| 10 | 6  | 0 | -3.789688 | -1.452666 | 0.155001  |
| 11 | 34 | 0 | 1.686420  | -1.204145 | -0.153165 |
| 12 | 6  | 0 | -1.179075 | -2.834559 | -0.017326 |
| 13 | 1  | 0 | 1.272761  | 2.566308  | 0.209423  |
| 14 | 1  | 0 | 1.344876  | 1.854295  | -1.403011 |
| 15 | 6  | 0 | 2.405524  | 0.724409  | 0.127440  |
| 16 | 6  | 0 | 3.673766  | 0.920750  | -0.719340 |
| 17 | 6  | 0 | 2.689773  | 0.876484  | 1.639027  |
| 18 | 1  | 0 | -3.782583 | 2.300736  | 0.050147  |
| 19 | 1  | 0 | -1.967092 | 3.499940  | 0.726120  |
| 20 | 1  | 0 | -2.140942 | 3.375964  | -1.042812 |
| 21 | 1  | 0 | -0.558392 | 3.593311  | -0.320943 |
| 22 | 1  | 0 | -3.865281 | -1.958407 | 1.127800  |
| 23 | 1  | 0 | -3.845913 | -2.230533 | -0.616029 |
| 24 | 1  | 0 | -4.655422 | -0.798441 | 0.050682  |
| 25 | 1  | 0 | -1.782120 | -3.246431 | 0.834663  |
| 26 | 1  | 0 | -0.158800 | -3.209008 | 0.141978  |
| 27 | 1  | 0 | -1.575247 | -3.258687 | -0.915399 |
| 28 | 1  | 0 | 3.494371  | 0.739080  | -1.784837 |
| 29 | 1  | 0 | 4.490600  | 0.270050  | -0.387131 |
| 30 | 1  | 0 | 4.017895  | 1.958143  | -0.608145 |
| 31 | 1  | 0 | 1.785065  | 0.759781  | 2.246437  |
| 32 | 1  | 0 | 3.094972  | 1.881862  | 1.819630  |
| 33 | 1  | 0 | 3.435105  | 0.153618  | 1.988032  |

**5d antioxidant**

E(RB+HF-LYP) = -589.419798910 (LANL2DZ)  
 E(ROB+HF-LYP) = -589.592041002 (LANL2DZdp)  
 Zero-point correction= 0.279325  
 Thermal correction to Enthalpy= 0.297495

|    |    |   |           |           |           |
|----|----|---|-----------|-----------|-----------|
| 1  | 6  | 0 | -2.079526 | 2.999691  | -0.310766 |
| 2  | 6  | 0 | -1.780952 | 1.513574  | -0.169463 |
| 3  | 6  | 0 | -1.378887 | -1.311456 | 0.050568  |
| 4  | 6  | 0 | -0.474444 | 0.978140  | -0.203038 |
| 5  | 6  | 0 | -2.862202 | 0.610184  | -0.015223 |
| 6  | 6  | 0 | -2.697125 | -0.785964 | 0.091237  |
| 7  | 6  | 0 | -0.293228 | -0.422397 | -0.089327 |
| 8  | 6  | 0 | 0.784476  | 1.811951  | -0.423107 |
| 9  | 8  | 0 | -4.190766 | 1.086322  | 0.033435  |
| 10 | 6  | 0 | -3.914690 | -1.682255 | 0.238868  |
| 11 | 52 | 0 | 1.761015  | -0.991558 | -0.170805 |
| 12 | 6  | 0 | -1.135972 | -2.807496 | 0.139391  |
| 13 | 1  | 0 | 0.677290  | 2.831414  | -0.027061 |
| 14 | 1  | 0 | 0.961410  | 1.904428  | -1.507101 |
| 15 | 6  | 0 | 2.046418  | 1.176807  | 0.229321  |
| 16 | 6  | 0 | 3.341975  | 1.701346  | -0.419097 |
| 17 | 6  | 0 | 2.059706  | 1.420443  | 1.755451  |
| 18 | 1  | 0 | -4.235937 | 2.059447  | -0.043361 |
| 19 | 1  | 0 | -2.556996 | 3.410959  | 0.592857  |
| 20 | 1  | 0 | -2.746171 | 3.200355  | -1.164381 |
| 21 | 1  | 0 | -1.173823 | 3.583866  | -0.483192 |
| 22 | 1  | 0 | -3.909775 | -2.208781 | 1.203840  |
| 23 | 1  | 0 | -3.946514 | -2.446480 | -0.549060 |
| 24 | 1  | 0 | -4.831009 | -1.092401 | 0.182446  |
| 25 | 1  | 0 | -1.971846 | -3.339062 | 0.602204  |

**5d phenoxyl radical**

E(ROB+HF-LYP) = -588.960104619  
 Thermal correction to Enthalpy= 0.284965

|    |    |   |           |           |           |
|----|----|---|-----------|-----------|-----------|
| 1  | 6  | 0 | -1.959046 | 3.087595  | -0.276427 |
| 2  | 6  | 0 | -1.739737 | 1.594578  | -0.157300 |
| 3  | 6  | 0 | -1.456225 | -1.281160 | 0.025579  |
| 4  | 6  | 0 | -0.474453 | 1.013275  | -0.200079 |
| 5  | 6  | 0 | -2.914156 | 0.730740  | -0.005778 |
| 6  | 6  | 0 | -2.742138 | -0.725315 | 0.077251  |
| 7  | 6  | 0 | -0.336487 | -0.407693 | -0.097707 |
| 8  | 6  | 0 | 0.802985  | 1.808173  | -0.434778 |
| 9  | 8  | 0 | -4.102598 | 1.251929  | 0.047277  |
| 10 | 6  | 0 | -3.993916 | -1.566411 | 0.219661  |
| 11 | 52 | 0 | 1.675903  | -1.030735 | -0.140796 |
| 12 | 6  | 0 | -1.224559 | -2.780586 | 0.098741  |
| 13 | 1  | 0 | 0.713051  | 2.829893  | -0.041115 |
| 14 | 1  | 0 | 0.961694  | 1.899451  | -1.521355 |
| 15 | 6  | 0 | 2.056926  | 1.141322  | 0.197091  |
| 16 | 6  | 0 | 3.356594  | 1.591332  | -0.496715 |
| 17 | 6  | 0 | 2.120917  | 1.407354  | 1.718162  |
| 18 | 1  | 0 | -1.473774 | 3.632590  | 0.546063  |
| 19 | 1  | 0 | -3.029431 | 3.303104  | -0.247244 |
| 20 | 1  | 0 | -1.547274 | 3.481948  | -1.215881 |
| 21 | 1  | 0 | -3.979799 | -2.158810 | 1.145064  |
| 22 | 1  | 0 | -4.104923 | -2.269708 | -0.617236 |
| 23 | 1  | 0 | -4.869089 | -0.913625 | 0.241169  |
| 24 | 1  | 0 | -2.151467 | -3.338174 | 0.247675  |
| 25 | 1  | 0 | -0.546251 | -3.031880 | 0.926873  |
| 26 | 1  | 0 | -0.761704 | -3.152377 | -0.827550 |
| 27 | 1  | 0 | 3.341446  | 1.374238  | -1.571152 |
| 28 | 1  | 0 | 4.239456  | 1.107712  | -0.059432 |
| 29 | 1  | 0 | 3.482152  | 2.677842  | -0.371028 |
| 30 | 1  | 0 | 1.192231  | 1.113622  | 2.219937  |
| 31 | 1  | 0 | 2.278630  | 2.483553  | 1.893251  |
| 32 | 1  | 0 | 2.948676  | 0.864190  | 2.188907  |

**5d radical cation**

E(UB+HF-LYP) = -589.178591604  
 Zero-point correction= 0.280116

|    |    |   |           |           |           |
|----|----|---|-----------|-----------|-----------|
| 1  | 6  | 0 | -2.007941 | 3.057691  | -0.258765 |
| 2  | 6  | 0 | -1.723220 | 1.570948  | -0.135326 |
| 3  | 6  | 0 | -1.407291 | -1.302378 | 0.023629  |
| 4  | 6  | 0 | -0.441790 | 1.015232  | -0.163912 |
| 5  | 6  | 0 | -2.829762 | 0.669748  | -0.002434 |
| 6  | 6  | 0 | -2.699529 | -0.750490 | 0.071480  |
| 7  | 6  | 0 | -0.289069 | -0.417407 | -0.078195 |
| 8  | 6  | 0 | 0.824377  | 1.835016  | -0.368159 |
| 9  | 8  | 0 | -4.115546 | 1.145769  | 0.053305  |
| 10 | 6  | 0 | -3.932626 | -1.618251 | 0.199136  |
| 11 | 52 | 0 | 1.691592  | -1.018785 | -0.135807 |
| 12 | 6  | 0 | -1.240702 | -2.806905 | 0.080841  |
| 13 | 1  | 0 | 0.747342  | 2.817515  | 0.112936  |
| 14 | 1  | 0 | 0.950067  | 2.020148  | -1.445734 |
| 15 | 6  | 0 | 2.110473  | 1.151865  | 0.177789  |
| 16 | 6  | 0 | 3.372719  | 1.584785  | -0.591551 |
| 17 | 6  | 0 | 2.271379  | 1.372162  | 1.701811  |
| 18 | 1  | 0 | -4.201255 | 2.121139  | 0.004714  |
| 19 | 1  | 0 | -2.474875 | 3.460851  | 0.652311  |
| 20 | 1  | 0 | -2.674027 | 3.271509  | -1.107841 |
| 21 | 1  | 0 | -1.101567 | 3.639176  | -0.430445 |
| 22 | 1  | 0 | -3.959017 | -2.122229 | 1.175352  |
| 23 | 1  | 0 | -3.945385 | -2.402345 | -0.567851 |



|    |   |   |           |           |           |
|----|---|---|-----------|-----------|-----------|
| 24 | 1 | 0 | -4.843803 | -1.027572 | 0.103360  |
| 25 | 1 | 0 | -1.796417 | -3.236413 | 0.922502  |
| 26 | 1 | 0 | -0.196140 | -3.116798 | 0.191120  |
| 27 | 1 | 0 | -1.629979 | -3.279970 | -0.830752 |
| 28 | 1 | 0 | 3.299546  | 1.381555  | -1.666106 |
| 29 | 1 | 0 | 4.275705  | 1.097672  | -0.205532 |
| 30 | 1 | 0 | 3.511237  | 2.668061  | -0.465594 |
| 31 | 1 | 0 | 1.369451  | 1.100327  | 2.261785  |
| 32 | 1 | 0 | 2.472899  | 2.438416  | 1.880527  |
| 33 | 1 | 0 | 3.115713  | 0.807549  | 2.112706  |

**6a antioxidant**

E(RB+HF-LYP) = -695.903412762 (LANL2DZ)

E(ROB+HF-LYP) = -696.104937888 (LANL2DZdp)

Zero-point correction= 0.313189

Thermal correction to Enthalpy= 0.331238

|    |   |   |           |           |           |
|----|---|---|-----------|-----------|-----------|
| 1  | 6 | 0 | -0.464426 | 2.901490  | -0.110809 |
| 2  | 6 | 0 | -0.788306 | 1.416836  | -0.080135 |
| 3  | 6 | 0 | -1.311692 | -1.393420 | -0.027791 |
| 4  | 6 | 0 | 0.262772  | 0.469166  | -0.130415 |
| 5  | 6 | 0 | -2.119207 | 0.945702  | -0.004299 |
| 6  | 6 | 0 | -2.352687 | -0.449942 | 0.029016  |
| 7  | 6 | 0 | 0.019784  | -0.922352 | -0.120428 |
| 8  | 8 | 0 | 1.567288  | 1.003237  | -0.222222 |
| 9  | 6 | 0 | -3.308462 | 1.893116  | 0.047931  |
| 10 | 8 | 0 | -3.667952 | -0.965644 | 0.113975  |
| 11 | 6 | 0 | -1.178401 | -1.906471 | -0.207267 |
| 12 | 6 | 0 | -1.621551 | -2.878461 | 0.004826  |
| 13 | 1 | 0 | -0.852480 | 3.418160  | 0.777978  |
| 14 | 1 | 0 | -0.901415 | 3.391386  | -0.992280 |
| 15 | 1 | 0 | 0.615813  | 3.048642  | -0.145499 |
| 16 | 1 | 0 | -3.883299 | 1.778224  | 0.980890  |
| 17 | 1 | 0 | -3.998507 | 1.727422  | -0.794376 |
| 18 | 1 | 0 | -2.995985 | 2.937578  | -0.001707 |
| 19 | 1 | 0 | -2.684509 | -3.042290 | 0.189814  |
| 20 | 1 | 0 | -1.048567 | -3.390392 | 0.790063  |
| 21 | 1 | 0 | -1.365039 | -3.362865 | -0.948891 |
| 22 | 1 | 0 | -4.333826 | -0.253311 | 0.178021  |
| 23 | 1 | 0 | 1.328377  | -2.392276 | 0.769594  |
| 24 | 6 | 0 | 2.485211  | -1.229295 | -0.665573 |
| 25 | 1 | 0 | 0.927108  | -2.716032 | -0.904793 |
| 26 | 6 | 0 | 2.723775  | 0.109590  | 0.064139  |
| 27 | 1 | 0 | 2.435069  | -1.020804 | -1.743042 |
| 28 | 1 | 0 | 3.339212  | -1.898938 | -0.497667 |
| 29 | 6 | 0 | 2.850768  | -0.054893 | 1.593113  |
| 30 | 6 | 0 | 3.926617  | 0.863268  | -0.515940 |
| 31 | 1 | 0 | 1.934793  | -0.464163 | 2.032380  |
| 32 | 1 | 0 | 3.041872  | 0.918925  | 2.058378  |
| 33 | 1 | 0 | 3.682875  | -0.727579 | 1.839774  |
| 34 | 1 | 0 | 4.011034  | 1.855182  | -0.057241 |
| 35 | 1 | 0 | 3.811107  | 0.995775  | -1.597764 |
| 36 | 1 | 0 | 4.855694  | 0.310601  | -0.325862 |

**6a phenoxy radical**

E(ROB+HF-LYP) = -695.475204466

Thermal correction to Enthalpy= 0.318720

|    |   |   |           |           |           |
|----|---|---|-----------|-----------|-----------|
| 1  | 6 | 0 | 0.558385  | -2.890414 | -0.102472 |
| 2  | 6 | 0 | 0.858805  | -1.403262 | -0.069605 |
| 3  | 6 | 0 | 1.315670  | 1.439312  | -0.020948 |
| 4  | 6 | 0 | -0.212771 | -0.454595 | -0.100051 |
| 5  | 6 | 0 | 2.171114  | -0.933828 | -0.001513 |
| 6  | 6 | 0 | 2.439787  | 0.504956  | 0.036925  |
| 7  | 6 | 0 | 0.006781  | 0.956488  | -0.097567 |
| 8  | 8 | 0 | -1.487580 | -1.002417 | -0.151811 |
| 9  | 6 | 0 | 3.349378  | -1.879847 | 0.043765  |
| 10 | 8 | 0 | 3.659858  | 0.948659  | 0.115710  |
| 11 | 6 | 0 | -1.178826 | 1.908033  | -0.186472 |
| 12 | 6 | 0 | 1.621518  | 2.920475  | -0.002150 |
| 13 | 1 | 0 | 0.906274  | -3.382709 | 0.816642  |
| 14 | 1 | 0 | 1.078213  | -3.376049 | -0.939318 |
| 15 | 1 | 0 | -0.511793 | -3.074018 | -0.206067 |

|    |   |   |           |           |           |
|----|---|---|-----------|-----------|-----------|
| 16 | 1 | 0 | 3.277746  | -2.569652 | 0.896654  |
| 17 | 1 | 0 | 4.277962  | -1.311421 | 0.128356  |
| 18 | 1 | 0 | 3.398772  | -2.499616 | -0.863228 |
| 19 | 1 | 0 | 2.691870  | 3.069852  | 0.154582  |
| 20 | 1 | 0 | 1.068922  | 3.438468  | 0.793902  |
| 21 | 1 | 0 | 1.343764  | 3.400478  | -0.952462 |
| 22 | 1 | 0 | -4.789843 | -0.410252 | -0.450319 |
| 23 | 1 | 0 | -1.360330 | 2.371843  | 0.794950  |
| 24 | 6 | 0 | -2.454912 | 1.200172  | -0.682273 |
| 25 | 1 | 0 | -0.936631 | 2.734915  | -0.865420 |
| 26 | 6 | 0 | -2.694562 | -0.133573 | 0.052238  |
| 27 | 1 | 0 | -2.367027 | 0.988272  | -1.756619 |
| 28 | 1 | 0 | -3.328024 | 1.851218  | -0.545926 |
| 29 | 6 | 0 | -2.894076 | 0.035702  | 1.571334  |
| 30 | 6 | 0 | -3.836522 | -0.938359 | -0.578066 |
| 31 | 1 | 0 | -2.024086 | 0.500634  | 2.046892  |
| 32 | 1 | 0 | -3.052598 | -0.942262 | 2.039153  |
| 33 | 1 | 0 | -3.772638 | 0.662602  | 1.771000  |
| 34 | 1 | 0 | -3.918101 | -1.922719 | -0.103687 |
| 35 | 1 | 0 | -3.659285 | -1.087070 | -1.649150 |

**6a radical cation**

E(UB+HF-LYP) = -695.658611294

Zero-point correction= 0.314069

|    |   |   |           |           |           |
|----|---|---|-----------|-----------|-----------|
| 1  | 6 | 0 | 0.483808  | -2.909168 | -0.063863 |
| 2  | 6 | 0 | 0.825134  | -1.435886 | -0.042184 |
| 3  | 6 | 0 | 1.300372  | 1.430005  | -0.012669 |
| 4  | 6 | 0 | -0.249056 | -0.453035 | -0.053211 |
| 5  | 6 | 0 | 2.137562  | -0.970100 | -0.002678 |
| 6  | 6 | 0 | 2.357067  | 0.450648  | 0.020762  |
| 7  | 6 | 0 | -0.012112 | 0.969025  | -0.063508 |
| 8  | 8 | 0 | -1.491452 | -0.968901 | -0.049926 |
| 9  | 6 | 0 | 3.342214  | -1.891216 | 0.023506  |
| 10 | 8 | 0 | 3.620231  | 0.963525  | 0.069035  |
| 11 | 6 | 0 | -1.194553 | 1.917935  | -0.129540 |
| 12 | 6 | 0 | 1.637031  | 2.903764  | -0.001647 |
| 13 | 1 | 0 | 0.871646  | -3.417171 | 0.828528  |
| 14 | 1 | 0 | 0.928280  | -3.402144 | -0.938006 |
| 15 | 1 | 0 | -0.593942 | -3.064891 | -0.099770 |
| 16 | 1 | 0 | 3.938246  | -1.756337 | 0.938447  |
| 17 | 1 | 0 | 3.998656  | -1.727596 | -0.844113 |
| 18 | 1 | 0 | 3.048921  | -2.940755 | -0.003276 |
| 19 | 1 | 0 | 2.687074  | 3.070090  | 0.240050  |
| 20 | 1 | 0 | 1.021262  | 3.444195  | 0.726524  |
| 21 | 1 | 0 | 1.446121  | 3.354765  | -0.985919 |
| 22 | 1 | 0 | 4.343071  | 0.299252  | 0.085433  |
| 23 | 1 | 0 | -1.387462 | 2.335539  | 0.869450  |
| 24 | 6 | 0 | -2.460599 | 1.229002  | -0.678895 |
| 25 | 1 | 0 | -0.945488 | 2.773396  | -0.766803 |
| 26 | 6 | 0 | -2.768709 | -0.100694 | 0.029437  |
| 27 | 1 | 0 | -2.344328 | 1.039135  | -1.753928 |
| 28 | 1 | 0 | -3.324609 | 1.892951  | -0.561036 |
| 29 | 6 | 0 | -3.079461 | 0.032488  | 1.529228  |
| 30 | 6 | 0 | -3.811423 | -0.941539 | -0.709125 |
| 31 | 1 | 0 | -2.298105 | 0.571802  | 2.074931  |
| 32 | 1 | 0 | -3.198307 | -0.956001 | 1.984032  |
| 33 | 1 | 0 | -4.021995 | 0.578811  | 1.654069  |
| 34 | 1 | 0 | -3.944682 | -1.914049 | -0.224587 |
| 35 | 1 | 0 | -3.522591 | -1.106032 | -1.752570 |
| 36 | 1 | 0 | -4.775647 | -0.419336 | -0.698018 |

**6b antioxidant**

E(RB+HF-LYP) = -630.781669237 (LANL2DZ)

E(ROB+HF-LYP) = -630.982751938 (LANL2DZdp)

Zero-point correction= 0.310777

Thermal correction to Enthalpy= 0.329292

|   |   |   |           |           |           |
|---|---|---|-----------|-----------|-----------|
| 1 | 6 | 0 | 0.960693  | -2.910444 | -0.004921 |
| 2 | 6 | 0 | 1.115794  | -1.395506 | -0.033784 |
| 3 | 6 | 0 | 1.423772  | 1.440638  | -0.046263 |
| 4 | 6 | 0 | -0.015867 | -0.537932 | -0.126139 |
| 5 | 6 | 0 | 2.410406  | -0.824968 | 0.026657  |

|    |    |   |           |           |           |
|----|----|---|-----------|-----------|-----------|
| 6  | 6  | 0 | 2.533291  | 0.581939  | 0.034364  |
| 7  | 6  | 0 | 0.126652  | 0.871833  | -0.150538 |
| 8  | 16 | 0 | -1.672535 | -1.371801 | -0.266525 |
| 9  | 6  | 0 | 3.677804  | -1.667449 | 0.075503  |
| 10 | 8  | 0 | 3.801386  | 1.197885  | 0.118474  |
| 11 | 6  | 0 | -1.044718 | 1.850431  | -0.238741 |
| 12 | 6  | 0 | 1.639097  | 2.943910  | -0.028936 |
| 13 | 1  | 0 | 1.607240  | -3.364034 | 0.755247  |
| 14 | 1  | 0 | 1.221348  | -3.360432 | -0.974000 |
| 15 | 1  | 0 | -0.064969 | -3.207680 | 0.226188  |
| 16 | 1  | 0 | 4.186524  | -1.591575 | 1.049951  |
| 17 | 1  | 0 | 4.393610  | -1.360941 | -0.703110 |
| 18 | 1  | 0 | 3.474151  | -2.725351 | -0.094969 |
| 19 | 1  | 0 | 2.686558  | 3.173315  | 0.172714  |
| 20 | 1  | 0 | 1.022813  | 3.431530  | 0.738138  |
| 21 | 1  | 0 | 1.373891  | 3.400364  | -0.993786 |
| 22 | 1  | 0 | 4.519253  | 0.543846  | 0.226673  |
| 23 | 1  | 0 | -1.164402 | 2.339708  | 0.740950  |
| 24 | 6  | 0 | -2.404512 | 1.290529  | -0.690207 |
| 25 | 1  | 0 | -0.772343 | 2.657824  | -0.930954 |
| 26 | 6  | 0 | -2.887042 | 0.066370  | 0.112912  |
| 27 | 1  | 0 | -2.362258 | 1.013986  | -1.752219 |
| 28 | 1  | 0 | -3.156297 | 2.090246  | -0.593309 |
| 29 | 6  | 0 | -2.932827 | 0.329210  | 1.632056  |
| 30 | 6  | 0 | -4.258148 | -0.416819 | -0.399661 |
| 31 | 1  | 0 | -1.939571 | 0.537718  | 2.042728  |
| 32 | 1  | 0 | -3.335546 | -0.542095 | 2.161357  |
| 33 | 1  | 0 | -3.582454 | 1.192315  | 1.844430  |
| 34 | 1  | 0 | -4.560593 | -1.352870 | 0.086574  |
| 35 | 1  | 0 | -4.242343 | -0.582571 | -1.483290 |
| 36 | 1  | 0 | -5.021503 | 0.341979  | -0.176520 |

#### 6b phenoxy radical

E(ROB+HF-LYP) = -630.351867628

Thermal correction to Enthalpy= 0.316752

|    |    |   |           |           |           |
|----|----|---|-----------|-----------|-----------|
| 1  | 6  | 0 | 0.984638  | -2.882960 | -0.045075 |
| 2  | 6  | 0 | 1.184565  | -1.376109 | -0.038983 |
| 3  | 6  | 0 | 1.440955  | 1.484273  | -0.033801 |
| 4  | 6  | 0 | 0.037035  | -0.507870 | -0.084486 |
| 5  | 6  | 0 | 2.465265  | -0.821662 | 0.017977  |
| 6  | 6  | 0 | 2.625832  | 0.632634  | 0.034029  |
| 7  | 6  | 0 | 0.161216  | 0.916094  | -0.106284 |
| 8  | 16 | 0 | -1.574623 | -1.372537 | -0.129607 |
| 9  | 6  | 0 | 3.726345  | -1.659779 | 0.075163  |
| 10 | 8  | 0 | 3.810545  | 1.163270  | 0.103674  |
| 11 | 6  | 0 | -1.037721 | 1.859978  | -0.181487 |
| 12 | 6  | 0 | 1.660628  | 2.982069  | -0.025713 |
| 13 | 1  | 0 | 0.392575  | -3.208529 | 0.821079  |
| 14 | 1  | 0 | 1.936656  | -3.415350 | -0.020081 |
| 15 | 1  | 0 | 0.441436  | -3.210215 | -0.942233 |
| 16 | 1  | 0 | 4.595560  | -1.000534 | 0.121930  |
| 17 | 1  | 0 | 3.825333  | -2.302460 | -0.810307 |
| 18 | 1  | 0 | 3.739123  | -2.313492 | 0.957996  |
| 19 | 1  | 0 | 2.718587  | 3.191696  | 0.144567  |
| 20 | 1  | 0 | 1.068639  | 3.477230  | 0.755779  |
| 21 | 1  | 0 | 1.373953  | 3.437361  | -0.985475 |
| 22 | 1  | 0 | -1.213522 | 2.295967  | 0.813985  |
| 23 | 6  | 0 | -2.350697 | 1.264404  | -0.717087 |
| 24 | 1  | 0 | -0.770074 | 2.707330  | -0.824286 |
| 25 | 6  | 0 | -2.866992 | 0.045388  | 0.071190  |
| 26 | 1  | 0 | -2.228493 | 0.977963  | -1.770597 |
| 27 | 1  | 0 | -3.126596 | 2.045003  | -0.683317 |
| 28 | 6  | 0 | -3.062400 | 0.339378  | 1.573256  |
| 29 | 6  | 0 | -4.165605 | -0.504095 | -0.551742 |
| 30 | 1  | 0 | -2.124485 | 0.611627  | 2.067559  |
| 31 | 1  | 0 | -3.467770 | -0.538216 | 2.089727  |
| 32 | 1  | 0 | -3.772431 | 1.170348  | 1.699541  |
| 33 | 1  | 0 | -4.481363 | -1.436721 | -0.067740 |
| 34 | 1  | 0 | -4.044791 | -0.697086 | -1.623881 |
| 35 | 1  | 0 | -4.971129 | 0.232043  | -0.421652 |

#### 6b radical cation

E(UB+HF-LYP) = -630.535902931

Zero-point correction= 0.311847

|    |    |   |           |           |           |
|----|----|---|-----------|-----------|-----------|
| 1  | 6  | 0 | 1.026415  | -2.919091 | -0.038024 |
| 2  | 6  | 0 | 1.163750  | -1.406219 | -0.024094 |
| 3  | 6  | 0 | 1.410344  | 1.476046  | -0.016286 |
| 4  | 6  | 0 | 0.002417  | -0.527235 | -0.031559 |
| 5  | 6  | 0 | 2.437591  | -0.830881 | 0.002143  |
| 6  | 6  | 0 | 2.539534  | 0.596126  | 0.015158  |
| 7  | 6  | 0 | 0.131052  | 0.908609  | -0.059900 |
| 8  | 16 | 0 | -1.584356 | -1.347355 | 0.028684  |
| 9  | 6  | 0 | 3.721272  | -1.641072 | 0.023835  |
| 10 | 8  | 0 | 3.760691  | 1.209769  | 0.049574  |
| 11 | 6  | 0 | -1.070906 | 1.843616  | -0.106177 |
| 12 | 6  | 0 | 1.637526  | 2.973084  | -0.001986 |
| 13 | 1  | 0 | 1.463614  | -3.359082 | 0.867126  |
| 14 | 1  | 0 | 1.555246  | -3.346155 | -0.898782 |
| 15 | 1  | 0 | -0.006952 | -3.261730 | -0.096445 |
| 16 | 1  | 0 | 4.317019  | -1.431454 | 0.925065  |
| 17 | 1  | 0 | 4.345579  | -1.433556 | -0.858194 |
| 18 | 1  | 0 | 3.532515  | -2.713883 | 0.023592  |
| 19 | 1  | 0 | 2.683666  | 3.208456  | 0.193944  |
| 20 | 1  | 0 | 1.024309  | 3.462209  | 0.763719  |
| 21 | 1  | 0 | 1.371424  | 3.422507  | -0.969019 |
| 22 | 1  | 0 | 4.532145  | 0.603613  | 0.064074  |
| 23 | 1  | 0 | -1.279617 | 2.207131  | 0.911196  |
| 24 | 6  | 0 | -2.354010 | 1.267453  | -0.729304 |
| 25 | 1  | 0 | -0.794234 | 2.733422  | -0.680385 |
| 26 | 6  | 0 | -2.951100 | 0.063465  | 0.016147  |
| 27 | 1  | 0 | -2.171442 | 0.992329  | -1.776738 |
| 28 | 1  | 0 | -3.119402 | 2.056134  | -0.738512 |
| 29 | 6  | 0 | -3.323616 | 0.351619  | 1.484501  |
| 30 | 6  | 0 | -4.129915 | -0.562140 | -0.753377 |
| 31 | 1  | 0 | -2.478193 | 0.709447  | 2.080105  |
| 32 | 1  | 0 | -3.727754 | -0.541001 | 1.973968  |
| 33 | 1  | 0 | -4.104847 | 1.123890  | 1.501888  |
| 34 | 1  | 0 | -4.490062 | -1.481182 | -0.276744 |
| 35 | 1  | 0 | -3.869276 | -0.786387 | -1.793356 |
| 36 | 1  | 0 | -4.961697 | 0.154538  | -0.758499 |

#### 6c antioxidant

E(RB+HF-LYP) = -629.899686744 (LANL2DZ)

E(ROB+HF-LYP) = -630.091906239 (LANL2DZdp)

Zero-point correction= 0.309637

Thermal correction to Enthalpy= 0.328559

|    |    |   |           |           |           |
|----|----|---|-----------|-----------|-----------|
| 1  | 6  | 0 | 0.976367  | -2.808949 | 0.028321  |
| 2  | 6  | 0 | 1.296850  | -1.322502 | -0.001348 |
| 3  | 6  | 0 | 1.786181  | 1.488652  | -0.034146 |
| 4  | 6  | 0 | 0.219794  | -0.388753 | -0.049751 |
| 5  | 6  | 0 | 2.629104  | -0.842124 | 0.021752  |
| 6  | 6  | 0 | 2.837076  | 0.558457  | 0.018097  |
| 7  | 6  | 0 | 0.449921  | 1.006670  | -0.088568 |
| 8  | 34 | 0 | -1.589404 | -1.188083 | -0.074026 |
| 9  | 6  | 0 | 3.861474  | -1.737379 | 0.049021  |
| 10 | 8  | 0 | 4.144054  | 1.093090  | 0.059210  |
| 11 | 6  | 0 | -0.661042 | 2.054758  | -0.149958 |
| 12 | 6  | 0 | 2.104465  | 2.974365  | -0.030485 |
| 13 | 1  | 0 | 1.861836  | -3.440022 | 0.116994  |
| 14 | 1  | 0 | 0.443959  | -3.117470 | -0.883106 |
| 15 | 1  | 0 | 0.319371  | -3.047876 | 0.876250  |
| 16 | 1  | 0 | 4.433579  | -1.615235 | 0.982852  |
| 17 | 1  | 0 | 4.536335  | -1.514540 | -0.792219 |
| 18 | 1  | 0 | 3.616017  | -2.796378 | -0.028080 |
| 19 | 1  | 0 | 3.167963  | 3.131164  | 0.156295  |
| 20 | 1  | 0 | 1.533594  | 3.507497  | 0.740942  |
| 21 | 1  | 0 | 1.860943  | 3.441885  | -0.995787 |
| 22 | 1  | 0 | 4.823131  | 0.396132  | 0.145100  |
| 23 | 1  | 0 | -0.807536 | 2.479350  | 0.855974  |
| 24 | 6  | 0 | -2.022788 | 1.611550  | -0.714934 |
| 25 | 1  | 0 | -0.311526 | 2.891448  | -0.766735 |
| 26 | 6  | 0 | -2.731780 | 0.492098  | 0.074175  |
| 27 | 1  | 0 | -1.903620 | 1.288868  | -1.758343 |
| 28 | 1  | 0 | -2.689159 | 2.490213  | -0.723156 |

|    |   |   |           |           |           |
|----|---|---|-----------|-----------|-----------|
| 29 | 6 | 0 | -2.944305 | 0.857290  | 1.559518  |
| 30 | 6 | 0 | -4.082350 | 0.141394  | -0.587629 |
| 31 | 1 | 0 | -1.998838 | 0.987282  | 2.095234  |
| 32 | 1 | 0 | -3.509527 | 0.071493  | 2.074551  |
| 33 | 1 | 0 | -3.516338 | 1.795911  | 1.634754  |
| 34 | 1 | 0 | -4.555407 | -0.726663 | -0.109924 |
| 35 | 1 | 0 | -3.959930 | -0.079416 | -1.654442 |
| 36 | 1 | 0 | -4.771355 | 0.993301  | -0.488325 |

**6c phenoxy radical**

E(ROB+HF-LYP) = -629.460717047

Thermal correction to Enthalpy= 0.316089

|    |    |   |           |           |           |
|----|----|---|-----------|-----------|-----------|
| 1  | 6  | 0 | 1.084299  | -2.791433 | -0.008002 |
| 2  | 6  | 0 | 1.360049  | -1.296314 | -0.014508 |
| 3  | 6  | 0 | 1.775993  | 1.544405  | -0.025925 |
| 4  | 6  | 0 | 0.258951  | -0.367727 | -0.038794 |
| 5  | 6  | 0 | 2.671431  | -0.814832 | 0.010590  |
| 6  | 6  | 0 | 2.912880  | 0.627680  | 0.016084  |
| 7  | 6  | 0 | 0.464245  | 1.048454  | -0.067799 |
| 8  | 34 | 0 | -1.507497 | -1.190725 | -0.026822 |
| 9  | 6  | 0 | 3.885206  | -1.721899 | 0.042699  |
| 10 | 8  | 0 | 4.126965  | 1.090568  | 0.055330  |
| 11 | 6  | 0 | -0.679955 | 2.061507  | -0.106209 |
| 12 | 6  | 0 | 2.084443  | 3.027351  | -0.017993 |
| 13 | 1  | 0 | 2.007923  | -3.372143 | -0.013925 |
| 14 | 1  | 0 | 0.497219  | -3.094326 | -0.886498 |
| 15 | 1  | 0 | 0.510892  | -3.087903 | 0.881782  |
| 16 | 1  | 0 | 4.790287  | -1.111440 | 0.065283  |
| 17 | 1  | 0 | 3.927581  | -2.372792 | -0.841327 |
| 18 | 1  | 0 | 3.882986  | -2.371152 | 0.928917  |
| 19 | 1  | 0 | 3.157528  | 3.171123  | 0.123673  |
| 20 | 1  | 0 | 1.546349  | 3.551966  | 0.782843  |
| 21 | 1  | 0 | 1.800200  | 3.505257  | -0.967261 |
| 22 | 1  | 0 | -0.859699 | 2.439241  | 0.912328  |
| 23 | 6  | 0 | -2.012666 | 1.592212  | -0.718447 |
| 24 | 1  | 0 | -0.345947 | 2.932110  | -0.681680 |
| 25 | 6  | 0 | -2.720615 | 0.452131  | 0.039827  |
| 26 | 1  | 0 | -1.853156 | 1.284561  | -1.761160 |
| 27 | 1  | 0 | -2.700836 | 2.452781  | -0.739722 |
| 28 | 6  | 0 | -3.020318 | 0.809623  | 1.511985  |
| 29 | 6  | 0 | -4.019721 | 0.041558  | -0.687288 |
| 30 | 1  | 0 | -2.110653 | 0.995135  | 2.091360  |
| 31 | 1  | 0 | -3.567642 | -0.001394 | 2.006655  |
| 32 | 1  | 0 | -3.644665 | 1.715615  | 1.551935  |
| 33 | 1  | 0 | -4.487197 | -0.836690 | -0.223357 |
| 34 | 1  | 0 | -3.835600 | -0.185507 | -1.743724 |
| 35 | 1  | 0 | -4.741727 | 0.869381  | -0.634119 |

**6c radical cation**

E(UB+HF-LYP) = -629.656860005

Zero-point correction= 0.310521

|    |    |   |           |           |           |
|----|----|---|-----------|-----------|-----------|
| 1  | 6  | 0 | 1.137431  | -2.831733 | -0.043130 |
| 2  | 6  | 0 | 1.338139  | -1.324962 | -0.027310 |
| 3  | 6  | 0 | 1.733468  | 1.537571  | -0.005670 |
| 4  | 6  | 0 | 0.222151  | -0.393140 | -0.018872 |
| 5  | 6  | 0 | 2.641401  | -0.814469 | -0.015368 |
| 6  | 6  | 0 | 2.815526  | 0.603803  | 0.002789  |
| 7  | 6  | 0 | 0.424405  | 1.034464  | -0.037474 |
| 8  | 34 | 0 | -1.518398 | -1.171634 | 0.069289  |
| 9  | 6  | 0 | 3.883967  | -1.687781 | -0.013273 |
| 10 | 8  | 0 | 4.069010  | 1.154441  | 0.024314  |
| 11 | 6  | 0 | -0.723894 | 2.037900  | -0.046599 |
| 12 | 6  | 0 | 2.039616  | 3.021507  | 0.025037  |
| 13 | 1  | 0 | 1.632468  | -3.278945 | -0.913633 |
| 14 | 1  | 0 | 0.090606  | -3.136805 | -0.087627 |
| 15 | 1  | 0 | 1.568645  | -3.293688 | 0.853716  |
| 16 | 1  | 0 | 4.496855  | -1.515603 | 0.884363  |
| 17 | 1  | 0 | 4.510116  | -1.501894 | -0.898816 |
| 18 | 1  | 0 | 3.644206  | -2.750263 | -0.022152 |
| 19 | 1  | 0 | 3.101540  | 3.195841  | 0.198490  |
| 20 | 1  | 0 | 1.473959  | 3.529935  | 0.814436  |

|    |   |   |           |           |           |
|----|---|---|-----------|-----------|-----------|
| 21 | 1 | 0 | 1.776050  | 3.501138  | -0.927874 |
| 22 | 1 | 0 | 4.806495  | 0.507832  | 0.024916  |
| 23 | 1 | 0 | -0.932928 | 2.348726  | 0.988281  |
| 24 | 6 | 0 | -2.029631 | 1.593689  | -0.731483 |
| 25 | 1 | 0 | -0.381929 | 2.943383  | -0.555783 |
| 26 | 6 | 0 | -2.793631 | 0.458051  | -0.029245 |
| 27 | 1 | 0 | -1.827508 | 1.312062  | -1.773845 |
| 28 | 1 | 0 | -2.707597 | 2.459166  | -0.766561 |
| 29 | 6 | 0 | -3.231680 | 0.797619  | 1.411369  |
| 30 | 6 | 0 | -3.988037 | -0.031210 | -0.875009 |
| 31 | 1 | 0 | -2.395794 | 1.070424  | 2.062843  |
| 32 | 1 | 0 | -3.763341 | -0.039732 | 1.876946  |
| 33 | 1 | 0 | -3.925587 | 1.649096  | 1.373194  |
| 34 | 1 | 0 | -4.489034 | -0.896493 | -0.424502 |
| 35 | 1 | 0 | -3.692168 | -0.291448 | -1.897352 |
| 36 | 1 | 0 | -4.726994 | 0.779441  | -0.933937 |

**6d antioxidant**

E(RB+HF-LYP) = -628.719583029 (LANL2DZ)

E(ROB+HF-LYP) = -628.903216052 (LANL2DZdp)

Zero-point correction= 0.308878

Thermal correction to Enthalpy= 0.327965

|    |    |   |           |           |           |
|----|----|---|-----------|-----------|-----------|
| 1  | 6  | 0 | -1.244897 | -2.765279 | 0.245330  |
| 2  | 6  | 0 | -1.520813 | -1.275701 | 0.098419  |
| 3  | 6  | 0 | -2.063988 | 1.528373  | -0.146671 |
| 4  | 6  | 0 | -0.470897 | -0.343368 | -0.118537 |
| 5  | 6  | 0 | -2.856674 | -0.802000 | 0.164830  |
| 6  | 6  | 0 | -3.092263 | 0.586591  | 0.056600  |
| 7  | 6  | 0 | -0.735146 | 1.046727  | -0.250433 |
| 8  | 52 | 0 | 1.556888  | -1.025427 | -0.337280 |
| 9  | 6  | 0 | -4.051793 | -1.731550 | 0.333020  |
| 10 | 8  | 0 | -4.403642 | 1.102103  | 0.140531  |
| 11 | 6  | 0 | 0.415967  | 2.016383  | -0.476680 |
| 12 | 6  | 0 | -2.414421 | 3.003702  | -0.260062 |
| 13 | 1  | 0 | -1.859891 | -3.216951 | 1.031802  |
| 14 | 1  | 0 | -0.199529 | -2.951444 | 0.513233  |
| 15 | 1  | 0 | -1.448517 | -3.311824 | -0.687607 |
| 16 | 1  | 0 | -4.825042 | -1.533908 | -0.425978 |
| 17 | 1  | 0 | -4.519466 | -1.629523 | 1.325420  |
| 18 | 1  | 0 | -3.774437 | -2.780338 | 0.218412  |
| 19 | 1  | 0 | -3.489146 | 3.144780  | -0.135049 |
| 20 | 1  | 0 | -2.130324 | 3.411062  | -1.239839 |
| 21 | 1  | 0 | -1.901107 | 3.601138  | 0.505688  |
| 22 | 1  | 0 | -5.060979 | 0.403595  | 0.327045  |
| 23 | 1  | 0 | 0.884624  | 1.808473  | -1.451750 |
| 24 | 6  | 0 | 1.502736  | 1.927089  | 0.631697  |
| 25 | 1  | 0 | 0.041649  | 3.041596  | -0.522929 |
| 26 | 6  | 0 | 2.566015  | 0.820864  | 0.427625  |
| 27 | 1  | 0 | 1.006459  | 1.786888  | 1.601402  |
| 28 | 1  | 0 | 2.043662  | 2.886250  | 0.685083  |
| 29 | 6  | 0 | 3.612296  | 1.244166  | -0.631293 |
| 30 | 6  | 0 | 3.269079  | 0.494511  | 1.765113  |
| 31 | 1  | 0 | 3.141179  | 1.550854  | -1.571702 |
| 32 | 1  | 0 | 4.314070  | 0.431400  | -0.859404 |
| 33 | 1  | 0 | 4.199067  | 2.093745  | -0.247113 |
| 34 | 1  | 0 | 4.033159  | -0.283964 | 1.644402  |
| 35 | 1  | 0 | 2.553944  | 0.152052  | 2.521174  |
| 36 | 1  | 0 | 3.770395  | 1.398476  | 2.148306  |

**6d phenoxy radical**

E(ROB+HF-LYP) = -628.270865988

Thermal correction to Enthalpy= 0.315506

|   |    |   |           |           |           |
|---|----|---|-----------|-----------|-----------|
| 1 | 6  | 0 | -1.266074 | -2.736964 | 0.072829  |
| 2 | 6  | 0 | -1.575982 | -1.249202 | 0.032345  |
| 3 | 6  | 0 | -2.069261 | 1.587114  | -0.093956 |
| 4 | 6  | 0 | -0.507281 | -0.297873 | -0.102284 |
| 5 | 6  | 0 | -2.896378 | -0.794780 | 0.120096  |
| 6 | 6  | 0 | -3.174279 | 0.641297  | 0.068798  |
| 7 | 6  | 0 | -0.753832 | 1.112076  | -0.180552 |
| 8 | 52 | 0 | 1.473085  | -1.060601 | -0.212566 |
| 9 | 6  | 0 | -4.083068 | -1.725598 | 0.271165  |

|    |   |   |           |           |           |
|----|---|---|-----------|-----------|-----------|
| 10 | 8 | 0 | -4.396679 | 1.073673  | 0.159127  |
| 11 | 6 | 0 | 0.402544  | 2.083176  | -0.385986 |
| 12 | 6 | 0 | -2.428215 | 3.058154  | -0.174246 |
| 13 | 1 | 0 | -0.606085 | -2.983572 | 0.916478  |
| 14 | 1 | 0 | -0.759386 | -3.066132 | -0.846729 |
| 15 | 1 | 0 | -2.170425 | -3.339316 | 0.173842  |
| 16 | 1 | 0 | -4.169530 | -2.412498 | -0.582081 |
| 17 | 1 | 0 | -4.999255 | -1.134596 | 0.331580  |
| 18 | 1 | 0 | -4.005359 | -2.338357 | 1.179662  |
| 19 | 1 | 0 | -3.509569 | 3.168542  | -0.069374 |
| 20 | 1 | 0 | -2.127787 | 3.498031  | -1.135198 |
| 21 | 1 | 0 | -1.942252 | 3.640991  | 0.620465  |
| 22 | 1 | 0 | 0.795890  | 1.968267  | -1.408104 |
| 23 | 6 | 0 | 1.563609  | 1.915895  | 0.627688  |
| 24 | 1 | 0 | 0.030728  | 3.107886  | -0.318569 |
| 25 | 6 | 0 | 2.587987  | 0.808078  | 0.288224  |
| 26 | 1 | 0 | 1.144885  | 1.738048  | 1.627724  |
| 27 | 1 | 0 | 2.126650  | 2.862132  | 0.682436  |
| 28 | 6 | 0 | 3.469258  | 1.196155  | -0.922552 |
| 29 | 6 | 0 | 3.482244  | 0.505863  | 1.513192  |
| 30 | 1 | 0 | 2.874175  | 1.440416  | -1.808611 |
| 31 | 1 | 0 | 4.158525  | 0.387602  | -1.196861 |
| 32 | 1 | 0 | 4.075797  | 2.077826  | -0.662360 |
| 33 | 1 | 0 | 4.206469  | -0.292249 | 1.304594  |
| 34 | 1 | 0 | 2.889141  | 0.208406  | 2.384996  |
| 35 | 1 | 0 | 4.052781  | 1.410095  | 1.777973  |

#### 6d radical cation

E(UB+HF-LYP) = -628.479701795

Zero-point correction= 0.309810

|    |    |   |           |           |           |
|----|----|---|-----------|-----------|-----------|
| 1  | 6  | 0 | -1.309377 | -2.775742 | 0.027311  |
| 2  | 6  | 0 | -1.544710 | -1.273887 | 0.008455  |
| 3  | 6  | 0 | -2.025687 | 1.574800  | -0.084256 |
| 4  | 6  | 0 | -0.462317 | -0.320721 | -0.100378 |
| 5  | 6  | 0 | -2.860237 | -0.794565 | 0.101650  |
| 6  | 6  | 0 | -3.073816 | 0.614956  | 0.057170  |
| 7  | 6  | 0 | -0.706261 | 1.098564  | -0.157171 |
| 8  | 52 | 0 | 1.492039  | -1.057445 | -0.179074 |
| 9  | 6  | 0 | -4.071825 | -1.699504 | 0.248519  |
| 10 | 8  | 0 | -4.342921 | 1.132776  | 0.137070  |
| 11 | 6  | 0 | 0.435255  | 2.090752  | -0.347048 |
| 12 | 6  | 0 | -2.383465 | 3.047724  | -0.159136 |
| 13 | 1  | 0 | -1.584247 | -3.207895 | 0.998138  |
| 14 | 1  | 0 | -0.270574 | -3.060229 | -0.160816 |
| 15 | 1  | 0 | -1.912408 | -3.276709 | -0.738414 |
| 16 | 1  | 0 | -4.744406 | -1.620511 | -0.618887 |
| 17 | 1  | 0 | -4.649271 | -1.458152 | 1.153754  |
| 18 | 1  | 0 | -3.797713 | -2.750391 | 0.334843  |
| 19 | 1  | 0 | -3.462284 | 3.185904  | -0.088858 |
| 20 | 1  | 0 | -2.047365 | 3.492587  | -1.104063 |
| 21 | 1  | 0 | -1.919036 | 3.614910  | 0.657741  |
| 22 | 1  | 0 | -5.055589 | 0.465580  | 0.226201  |
| 23 | 1  | 0 | 0.799936  | 2.028793  | -1.383490 |
| 24 | 6  | 0 | 1.622566  | 1.918261  | 0.631867  |
| 25 | 1  | 0 | 0.049824  | 3.104403  | -0.231935 |
| 26 | 6  | 0 | 2.641176  | 0.820446  | 0.258086  |
| 27 | 1  | 0 | 1.241012  | 1.745283  | 1.647033  |
| 28 | 1  | 0 | 2.185317  | 2.863392  | 0.664844  |
| 29 | 6  | 0 | 3.465101  | 1.167957  | -1.003338 |
| 30 | 6  | 0 | 3.571939  | 0.484427  | 1.445141  |
| 31 | 1  | 0 | 2.842480  | 1.415635  | -1.869290 |
| 32 | 1  | 0 | 4.139477  | 0.352857  | -1.291748 |
| 33 | 1  | 0 | 4.090492  | 2.043700  | -0.778294 |
| 34 | 1  | 0 | 4.284702  | -0.313849 | 1.204357  |
| 35 | 1  | 0 | 3.016725  | 0.197439  | 2.345163  |
| 36 | 1  | 0 | 4.160209  | 1.381397  | 1.687797  |
